# Supplementary material for: Host Plant Specialization in the Sugarcane Aphid Melanaphis sacchari
Source: PLoS One. 2015 Nov 24;10(11):e0143704. doi: 10.1371/journal.pone.0143704 (PMC4658203; doi:10.1371/journal.pone.0143704)
Supplement: S1 Table — (XLSX) [file pone.0143704.s002.xlsx]

## Sheet: whole sample
Sample	State	Locality	Place	Date of sampling	Host plant (com. name)	Host plant (sci. name)	MLG	Specimen ID	Field ID	BOLD reference	COI GenBank accession
Run1	Reunion	Sainte Marie	eRcane Experimental Station	June, 2007	sugarcane	Saccharum sp.	Ms16	CIR53#SMA1009	SMA1_9
Run1	Reunion	Sainte Marie	eRcane Experimental Station	June, 2007	sugarcane	Saccharum sp.	Ms16	CIR53#SMA1010	SMA1_10
Run1	Reunion	Sainte Marie	eRcane Experimental Station	June, 2007	sugarcane	Saccharum sp.	Ms16	CIR53#SMA1013	SMA1_13
Run1	Reunion	Sainte Marie	eRcane Experimental Station	June, 2007	sugarcane	Saccharum sp.	Ms16	CIR53#SMA1014	SMA1_14
Run1	Reunion	Sainte Marie	eRcane Experimental Station	June, 2007	sugarcane	Saccharum sp.	Ms16	CIR53#SMA1015	SMA1_15
Run1	Reunion	Sainte Marie	eRcane Experimental Station	June, 2007	sugarcane	Saccharum sp.	Ms16	CIR53#SMA1018	SMA1_18
Run1	Reunion	Sainte Marie	eRcane Experimental Station	June, 2007	sugarcane	Saccharum sp.	Ms16	CIR53#SMA1020	SMA1_20
Run1	Reunion	Sainte Marie	eRcane Experimental Station	June, 2007	sugarcane	Saccharum sp.	Ms16	CIR53#SMA1021	SMA1_21
Run1	Reunion	Sainte Marie	eRcane Experimental Station	June, 2007	sugarcane	Saccharum sp.	Ms16	CIR53#SMA1026	SMA1_26
Run1	Reunion	Sainte Marie	eRcane Experimental Station	June, 2007	sugarcane	Saccharum sp.	Ms16	CIR53#SMA1027	SMA1_27
Run1	Reunion	Sainte Marie	eRcane Experimental Station	June, 2007	sugarcane	Saccharum sp.	Ms16	CIR53#SMA1031	SMA1_31
Run1	Reunion	Sainte Marie	eRcane Experimental Station	June, 2007	sugarcane	Saccharum sp.	Ms16	CIR53#SMA1033	SMA1_33
Run1	Reunion	Sainte Marie	eRcane Experimental Station	June, 2007	sugarcane	Saccharum sp.	Ms16	CIR53#SMA1034	SMA1_34
Run1	Reunion	Sainte Marie	eRcane Experimental Station	June, 2007	sugarcane	Saccharum sp.	Ms16	CIR53#SMA1038	SMA1_38
Run1	Reunion	Sainte Marie	eRcane Experimental Station	June, 2007	sugarcane	Saccharum sp.	Ms16	CIR53#SMA1045	SMA1_45
Run2	Reunion	Etang Salé	eRcane Experimental Station	April, 2008	sugarcane	Saccharum sp.	Ms16	CIR53#2223001	22.23_1
Run2	Reunion	Etang Salé	eRcane Experimental Station	April, 2008	sugarcane	Saccharum sp.	Ms16	CIR53#2223004	22.23_4
Run2	Reunion	Etang Salé	eRcane Experimental Station	April, 2008	sugarcane	Saccharum sp.	Ms16	CIR53#2223006	22.23_6
Run2	Reunion	Etang Salé	eRcane Experimental Station	April, 2008	sugarcane	Saccharum sp.	Ms16	CIR53#2223007	22.23_7
Run2	Reunion	Etang Salé	eRcane Experimental Station	April, 2008	sugarcane	Saccharum sp.	Ms16	CIR53#2223009	22.23_9
Run2	Reunion	Etang Salé	eRcane Experimental Station	April, 2008	sugarcane	Saccharum sp.	Ms12	CIR53#2223010	22.23_10
Run2	Reunion	Etang Salé	eRcane Experimental Station	April, 2008	sugarcane	Saccharum sp.	Ms16	CIR53#2223014	22.23_14
Run2	Reunion	Etang Salé	eRcane Experimental Station	April, 2008	sugarcane	Saccharum sp.	Ms12	CIR53#2223016	22.23_16
Run2	Reunion	Etang Salé	eRcane Experimental Station	April, 2008	sugarcane	Saccharum sp.	Ms16	CIR53#2223017	22.23_17
Run2	Reunion	Etang Salé	eRcane Experimental Station	April, 2008	sugarcane	Saccharum sp.	Ms12	CIR53#2223018	22.23_18
Run2	Reunion	Etang Salé	eRcane Experimental Station	April, 2008	sugarcane	Saccharum sp.	Ms16	CIR53#2223020	22.23_20
Run2	Reunion	Etang Salé	eRcane Experimental Station	April, 2008	sugarcane	Saccharum sp.	Ms16	CIR53#2223023	22.23_23
Run2	Reunion	Etang Salé	eRcane Experimental Station	April, 2008	sugarcane	Saccharum sp.	Ms12	CIR53#2223025	22.23_25
Run2	Reunion	Etang Salé	eRcane Experimental Station	April, 2008	sugarcane	Saccharum sp.	Ms16	CIR53#2223026	22.23_26
Run2	Reunion	Etang Salé	eRcane Experimental Station	April, 2008	sugarcane	Saccharum sp.	Ms16	CIR53#2223027	22.23_27
Run2	Reunion	Etang Salé	eRcane Experimental Station	April, 2008	sugarcane	Saccharum sp.	Ms16	CIR53#2223030	22.23_30
Run2	Reunion	Etang Salé	eRcane Experimental Station	April, 2008	sugarcane	Saccharum sp.	Ms16	CIR53#2223033	22.23_33
Run2	Reunion	Etang Salé	eRcane Experimental Station	April, 2008	sugarcane	Saccharum sp.	Ms16	CIR53#2223034	22.23_34
Run2	Reunion	Etang Salé	eRcane Experimental Station	April, 2008	sugarcane	Saccharum sp.	Ms16	CIR53#2223035	22.23_35
Run2	Reunion	Etang Salé	eRcane Experimental Station	April, 2008	sugarcane	Saccharum sp.	Ms16	CIR53#2223037	22.23_37
Run2	Reunion	Etang Salé	eRcane Experimental Station	April, 2008	sugarcane	Saccharum sp.	Ms16	CIR53#2223039	22.23_39
Run2	Reunion	Etang Salé	eRcane Experimental Station	April, 2008	sugarcane	Saccharum sp.	Ms16	CIR53#2223040	22.23_40
Run2	Reunion	Etang Salé	eRcane Experimental Station	April, 2008	sugarcane	Saccharum sp.	Ms16	CIR53#2223041	22.23_41
Run2	Reunion	Etang Salé	eRcane Experimental Station	April, 2008	sugarcane	Saccharum sp.	Ms16	CIR53#2223042	22.23_42
Run2	Reunion	Etang Salé	eRcane Experimental Station	April, 2008	sugarcane	Saccharum sp.	Ms12	CIR53#2223043	22.23_43
Run2	Reunion	Etang Salé	eRcane Experimental Station	April, 2008	sugarcane	Saccharum sp.	Ms16	CIR53#2223046	22.23_46
Run2	Reunion	Etang Salé	eRcane Experimental Station	April, 2008	sugarcane	Saccharum sp.	Ms16	CIR53#2223048	22.23_48
Run3	Reunion	Saint-Pierre	Ligne Paradis Cirad Station	October, 2007	sugarcane	Saccharum sp.	Ms16	CIR53#3001001	30-1_1
Run3	Reunion	Saint-Pierre	Ligne Paradis Cirad Station	October, 2007	sugarcane	Saccharum sp.	Ms16	CIR53#3001002	30-1_2
Run3	Reunion	Saint-Pierre	Ligne Paradis Cirad Station	October, 2007	sugarcane	Saccharum sp.	Ms16	CIR53#3001003	30-1_3
Run3	Reunion	Saint-Pierre	Ligne Paradis Cirad Station	October, 2007	sugarcane	Saccharum sp.	Ms16	CIR53#3001004	30-1_4
Run3	Reunion	Saint-Pierre	Ligne Paradis Cirad Station	October, 2007	sugarcane	Saccharum sp.	Ms16	CIR53#3001005	30-1_5
Run3	Reunion	Saint-Pierre	Ligne Paradis Cirad Station	October, 2007	sugarcane	Saccharum sp.	Ms16	CIR53#3001006	30-1_6
Run3	Reunion	Saint-Pierre	Ligne Paradis Cirad Station	October, 2007	sugarcane	Saccharum sp.	Ms16	CIR53#3001007	30-1_7
Run3	Reunion	Saint-Pierre	Ligne Paradis Cirad Station	October, 2007	sugarcane	Saccharum sp.	Ms16	CIR53#3001008	30-1_8
Run3	Reunion	Saint-Pierre	Ligne Paradis Cirad Station	October, 2007	sugarcane	Saccharum sp.	Ms16	CIR53#3001009	30-1_9
Run3	Reunion	Saint-Pierre	Ligne Paradis Cirad Station	October, 2007	sugarcane	Saccharum sp.	Ms16	CIR53#3001010	30-1_10
Run3	Reunion	Saint-Pierre	Ligne Paradis Cirad Station	October, 2007	sugarcane	Saccharum sp.	Ms16	CIR53#3001011	30-1_11
Run3	Reunion	Saint-Pierre	Ligne Paradis Cirad Station	October, 2007	sugarcane	Saccharum sp.	Ms16	CIR53#3001012	30-1_12
Run3	Reunion	Saint-Pierre	Ligne Paradis Cirad Station	October, 2007	sugarcane	Saccharum sp.	Ms16	CIR53#3001013	30-1_13
Run3	Reunion	Saint-Pierre	Ligne Paradis Cirad Station	October, 2007	sugarcane	Saccharum sp.	Ms16	CIR53#3001014	30-1_14
Run3	Reunion	Saint-Pierre	Ligne Paradis Cirad Station	October, 2007	sugarcane	Saccharum sp.	Ms16	CIR53#3001015	30-1_15
Run3	Reunion	Saint-Pierre	Ligne Paradis Cirad Station	October, 2007	sugarcane	Saccharum sp.	Ms16	CIR53#3001016	30-1_16
Run3	Reunion	Saint-Pierre	Ligne Paradis Cirad Station	October, 2007	sugarcane	Saccharum sp.	Ms16	CIR53#3001017	30-1_17
Run3	Reunion	Saint-Pierre	Ligne Paradis Cirad Station	October, 2007	sugarcane	Saccharum sp.	Ms16	CIR53#3001018	30-1_18
Run3	Reunion	Saint-Pierre	Ligne Paradis Cirad Station	October, 2007	sugarcane	Saccharum sp.	Ms16	CIR53#3001020	30-1_20
Run3	Reunion	Saint-Pierre	Ligne Paradis Cirad Station	October, 2007	sugarcane	Saccharum sp.	Ms16	CIR53#3001021	30-1_21
Run3	Reunion	Saint-Pierre	Ligne Paradis Cirad Station	October, 2007	sugarcane	Saccharum sp.	Ms16	CIR53#3001022	30-1_22
Run3	Reunion	Saint-Pierre	Ligne Paradis Cirad Station	October, 2007	sugarcane	Saccharum sp.	Ms16	CIR53#3001023	30-1_23
Run3	Reunion	Saint-Pierre	Ligne Paradis Cirad Station	October, 2007	sugarcane	Saccharum sp.	Ms16	CIR53#3001024	30-1_24
Run3	Reunion	Saint-Pierre	Ligne Paradis Cirad Station	October, 2007	sugarcane	Saccharum sp.	Ms16	CIR53#3001025	30-1_25
Run3	Reunion	Saint-Pierre	Ligne Paradis Cirad Station	October, 2007	sugarcane	Saccharum sp.	Ms16	CIR53#3001026	30-1_26
Run3	Reunion	Saint-Pierre	Ligne Paradis Cirad Station	October, 2007	sugarcane	Saccharum sp.	Ms16	CIR53#3001027	30-1_27
Run3	Reunion	Saint-Pierre	Ligne Paradis Cirad Station	October, 2007	sugarcane	Saccharum sp.	Ms16	CIR53#3001028	30-1_28
Run3	Reunion	Saint-Pierre	Ligne Paradis Cirad Station	October, 2007	sugarcane	Saccharum sp.	Ms16	CIR53#3001029	30-1_29
Run3	Reunion	Saint-Pierre	Ligne Paradis Cirad Station	October, 2007	sugarcane	Saccharum sp.	Ms16	CIR53#3001030	30-1_30
Run3	Reunion	Saint-Pierre	Ligne Paradis Cirad Station	October, 2007	sugarcane	Saccharum sp.	Ms16	CIR53#3001031	30-1_31
Run3	Reunion	Saint-Pierre	Ligne Paradis Cirad Station	October, 2007	sugarcane	Saccharum sp.	Ms16	CIR53#3001032	30-1_32
Run4	Reunion	Savanna	ISB	April, 2008	sugarcane	Saccharum sp.	Ms21	CIR53#2220001	22-20_1	MSW031-13	KJ083185
Run4	Reunion	Savanna	ISB	April, 2008	sugarcane	Saccharum sp.	Ms21	CIR53#2220002	22-20_2
Run4	Reunion	Savanna	ISB	April, 2008	sugarcane	Saccharum sp.	Ms21	CIR53#2220003	22-20_3
Run4	Reunion	Savanna	ISB	April, 2008	sugarcane	Saccharum sp.	Ms21	CIR53#2220004	22-20_4
Run4	Reunion	Savanna	ISB	April, 2008	sugarcane	Saccharum sp.	Ms21	CIR53#2220005	22-20_5
Run4	Reunion	Savanna	ISB	April, 2008	sugarcane	Saccharum sp.	Ms21	CIR53#2220006	22-20_6
Run4	Reunion	Savanna	ISB	April, 2008	sugarcane	Saccharum sp.	Ms21	CIR53#2220007	22-20_7
Run4	Reunion	Savanna	ISB	April, 2008	sugarcane	Saccharum sp.	Ms21	CIR53#2220008	22-20_8
Run4	Reunion	Savanna	ISB	April, 2008	sugarcane	Saccharum sp.	Ms21	CIR53#2220010	22-20_10
Run4	Reunion	Savanna	ISB	April, 2008	sugarcane	Saccharum sp.	Ms21	CIR53#2220011	22-20_11
Run4	Reunion	Savanna	ISB	April, 2008	sugarcane	Saccharum sp.	Ms16	CIR53#2220012	22-20_12
Run4	Reunion	Savanna	ISB	April, 2008	sugarcane	Saccharum sp.	Ms21	CIR53#2220015	22-20_15
Run4	Reunion	Savanna	ISB	April, 2008	sugarcane	Saccharum sp.	Ms21	CIR53#2220016	22-20_16
Run4	Reunion	Savanna	ISB	April, 2008	sugarcane	Saccharum sp.	Ms21	CIR53#2220017	22-20_17
Run4	Reunion	Savanna	ISB	April, 2008	sugarcane	Saccharum sp.	Ms21	CIR53#2220018	22-20_18
Run4	Reunion	Savanna	ISB	April, 2008	sugarcane	Saccharum sp.	Ms21	CIR53#2220019	22-20_19
Run4	Reunion	Savanna	ISB	April, 2008	sugarcane	Saccharum sp.	Ms21	CIR53#2220020	22-20_20
Run4	Reunion	Savanna	ISB	April, 2008	sugarcane	Saccharum sp.	Ms21	CIR53#2220021	22-20_21
Run4	Reunion	Savanna	ISB	April, 2008	sugarcane	Saccharum sp.	Ms21	CIR53#2220022	22-20_22
Run4	Reunion	Savanna	ISB	April, 2008	sugarcane	Saccharum sp.	Ms21	CIR53#2220023	22-20_23
Run4	Reunion	Savanna	ISB	April, 2008	sugarcane	Saccharum sp.	Ms21	CIR53#2220024	22-20_24
Run4	Reunion	Savanna	ISB	April, 2008	sugarcane	Saccharum sp.	Ms21	CIR53#2220025	22-20_25
Run4	Reunion	Savanna	ISB	April, 2008	sugarcane	Saccharum sp.	Ms21	CIR53#2220026	22-20_26
Run4	Reunion	Savanna	ISB	April, 2008	sugarcane	Saccharum sp.	Ms21	CIR53#2220027	22-20_27
Run4	Reunion	Savanna	ISB	April, 2008	sugarcane	Saccharum sp.	Ms21	CIR53#2220028	22-20_28
Run4	Reunion	Savanna	ISB	April, 2008	sugarcane	Saccharum sp.	Ms21	CIR53#2220030	22-20_30
Run4	Reunion	Savanna	ISB	April, 2008	sugarcane	Saccharum sp.	Ms21	CIR53#2220031	22-20_31
Run4	Reunion	Savanna	ISB	April, 2008	sugarcane	Saccharum sp.	Ms21	CIR53#2220032	22-20_32
Run5	Reunion	Saint André	Sugar factory	April, 2008	sugarcane	Saccharum sp.	Ms16	CIR53#2211001	22-11_1
Run5	Reunion	Saint André	Sugar factory	April, 2008	sugarcane	Saccharum sp.	Ms16	CIR53#2211002	22-11_2
Run5	Reunion	Saint André	Sugar factory	April, 2008	sugarcane	Saccharum sp.	Ms16	CIR53#2211003	22-11_3
Run5	Reunion	Saint André	Sugar factory	April, 2008	sugarcane	Saccharum sp.	Ms16	CIR53#2211006	22-11_6
Run5	Reunion	Saint André	Sugar factory	April, 2008	sugarcane	Saccharum sp.	Ms16	CIR53#2211007	22-11_7
Run5	Reunion	Saint André	Sugar factory	April, 2008	sugarcane	Saccharum sp.	Ms16	CIR53#2211008	22-11_8
Run5	Reunion	Saint André	Sugar factory	April, 2008	sugarcane	Saccharum sp.	Ms16	CIR53#2211009	22-11_9
Run5	Reunion	Saint André	Sugar factory	April, 2008	sugarcane	Saccharum sp.	Ms16	CIR53#2211010	22-11_10
Run5	Reunion	Saint André	Sugar factory	April, 2008	sugarcane	Saccharum sp.	Ms16	CIR53#2211011	22-11_11
Run5	Reunion	Saint André	Sugar factory	April, 2008	sugarcane	Saccharum sp.	Ms16	CIR53#2211012	22-11_12
Run5	Reunion	Saint André	Sugar factory	April, 2008	sugarcane	Saccharum sp.	Ms16	CIR53#2211016	22-11_16
Run5	Reunion	Saint André	Sugar factory	April, 2008	sugarcane	Saccharum sp.	Ms16	CIR53#2211017	22-11_17
Run5	Reunion	Saint André	Sugar factory	April, 2008	sugarcane	Saccharum sp.	Ms16	CIR53#2211018	22-11_18
Run5	Reunion	Saint André	Sugar factory	April, 2008	sugarcane	Saccharum sp.	Ms16	CIR53#2211019	22-11_19
Run5	Reunion	Saint André	Sugar factory	April, 2008	sugarcane	Saccharum sp.	Ms16	CIR53#2211020	22-11_20
Run5	Reunion	Saint André	Sugar factory	April, 2008	sugarcane	Saccharum sp.	Ms16	CIR53#2211022	22-11_22
Run5	Reunion	Saint André	Sugar factory	April, 2008	sugarcane	Saccharum sp.	Ms16	CIR53#2211023	22-11_23
Run5	Reunion	Saint André	Sugar factory	April, 2008	sugarcane	Saccharum sp.	Ms16	CIR53#2211024	22-11_24
Run5	Reunion	Saint André	Sugar factory	April, 2008	sugarcane	Saccharum sp.	Ms16	CIR53#2211025	22-11_25
Run5	Reunion	Saint André	Sugar factory	April, 2008	sugarcane	Saccharum sp.	Ms16	CIR53#2211026	22-11_26
Run5	Reunion	Saint André	Sugar factory	April, 2008	sugarcane	Saccharum sp.	Ms16	CIR53#2211027	22-11_27
Run5	Reunion	Saint André	Sugar factory	April, 2008	sugarcane	Saccharum sp.	Ms16	CIR53#2211028	22-11_28
Run5	Reunion	Saint André	Sugar factory	April, 2008	sugarcane	Saccharum sp.	Ms16	CIR53#2211029	22-11_29
Run5	Reunion	Saint André	Sugar factory	April, 2008	sugarcane	Saccharum sp.	Ms16	CIR53#2211030	22-11_30
Run5	Reunion	Saint André	Sugar factory	April, 2008	sugarcane	Saccharum sp.	Ms16	CIR53#2211031	22-11_31
Run5	Reunion	Saint André	Sugar factory	April, 2008	sugarcane	Saccharum sp.	Ms16	CIR53#2211032	22-11_32
Run6	Reunion	Entre Deux		March, 2009	sorghum	Sorghum verticilliflorum	Ms15	CIR53#6302001	30_1
Run6	Reunion	Entre Deux		March, 2009	sorghum	Sorghum verticilliflorum	Ms15	CIR53#6302002	30_2
Run6	Reunion	Entre Deux		March, 2009	sorghum	Sorghum verticilliflorum	Ms15	CIR53#6302003	30_3
Run6	Reunion	Entre Deux		March, 2009	sorghum	Sorghum verticilliflorum	Ms15	CIR53#6302004	30_4
Run6	Reunion	Entre Deux		March, 2009	sorghum	Sorghum verticilliflorum	Ms15	CIR53#6302005	30_5
Run6	Reunion	Entre Deux		March, 2009	sorghum	Sorghum verticilliflorum	Ms15	CIR53#6302007	30_7
Run6	Reunion	Entre Deux		March, 2009	sorghum	Sorghum verticilliflorum	Ms15	CIR53#6302009	30_9
Run6	Reunion	Entre Deux		March, 2009	sorghum	Sorghum verticilliflorum	Ms15	CIR53#6302012	30_12
Run6	Reunion	Entre Deux		March, 2009	sorghum	Sorghum verticilliflorum	Ms15	CIR53#6302017	30_17
Run6	Reunion	Entre Deux		March, 2009	sorghum	Sorghum verticilliflorum	Ms15	CIR53#6302018	30_18
Run6	Reunion	Entre Deux		March, 2009	sorghum	Sorghum verticilliflorum	Ms15	CIR53#6302020	30_20
Run6	Reunion	Entre Deux		March, 2009	sorghum	Sorghum verticilliflorum	Ms15	CIR53#6302023	30_23
Run6	Reunion	Entre Deux		March, 2009	sorghum	Sorghum verticilliflorum	Ms15	CIR53#6302924	30_24	MSW108-13	KJ083108
Run6	Reunion	Entre Deux		March, 2009	sorghum	Sorghum verticilliflorum	Ms15	CIR53#6302025	30_25
Run6	Reunion	Entre Deux		March, 2009	sorghum	Sorghum verticilliflorum	Ms15	CIR53#6302027	30_27
Run6	Reunion	Entre Deux		March, 2009	sorghum	Sorghum verticilliflorum	Ms15	CIR53#6302029	30_29
Run6	Reunion	Entre Deux		March, 2009	sorghum	Sorghum verticilliflorum	Ms15	CIR53#6302030	30_30
Run6	Reunion	Entre Deux		March, 2009	sorghum	Sorghum verticilliflorum	Ms15	CIR53#6302032	30_32
Run7	Reunion	Bras Panon	Beauvallon	January, 2010	sorghum	Sorghum verticilliflorum	Ms16	CIR53#2222001	22-22_1
Run7	Reunion	Bras Panon	Beauvallon	January, 2010	sorghum	Sorghum verticilliflorum	Ms16	CIR53#2222002	22-22_2
Run7	Reunion	Bras Panon	Beauvallon	January, 2010	sorghum	Sorghum verticilliflorum	Ms16	CIR53#2222003	22-22_3
Run7	Reunion	Bras Panon	Beauvallon	January, 2010	sorghum	Sorghum verticilliflorum	Ms16	CIR53#2222004	22-22_4
Run7	Reunion	Bras Panon	Beauvallon	January, 2010	sorghum	Sorghum verticilliflorum	Ms16	CIR53#2222005	22-22_5
Run7	Reunion	Bras Panon	Beauvallon	January, 2010	sorghum	Sorghum verticilliflorum	Ms16	CIR53#2222006	22-22_6	MSW032-13	KJ083184
Run7	Reunion	Bras Panon	Beauvallon	January, 2010	sorghum	Sorghum verticilliflorum	Ms16	CIR53#2222007	22-22_7
Run7	Reunion	Bras Panon	Beauvallon	January, 2010	sorghum	Sorghum verticilliflorum	Ms16	CIR53#2222008	22-22_8
Run7	Reunion	Bras Panon	Beauvallon	January, 2010	sorghum	Sorghum verticilliflorum	Ms16	CIR53#2222009	22-22_9
Run7	Reunion	Bras Panon	Beauvallon	January, 2010	sorghum	Sorghum verticilliflorum	Ms16	CIR53#2222010	22-22_10
Run7	Reunion	Bras Panon	Beauvallon	January, 2010	sorghum	Sorghum verticilliflorum	Ms16	CIR53#2222011	22-22_11
Run7	Reunion	Bras Panon	Beauvallon	January, 2010	sorghum	Sorghum verticilliflorum	Ms16	CIR53#2222012	22-22_12
Run7	Reunion	Bras Panon	Beauvallon	January, 2010	sorghum	Sorghum verticilliflorum	Ms16	CIR53#2222013	22-22_13
Run7	Reunion	Bras Panon	Beauvallon	January, 2010	sorghum	Sorghum verticilliflorum	Ms16	CIR53#2222014	22-22_14
Run7	Reunion	Bras Panon	Beauvallon	January, 2010	sorghum	Sorghum verticilliflorum	Ms16	CIR53#2222015	22-22_15
Run7	Reunion	Bras Panon	Beauvallon	January, 2010	sorghum	Sorghum verticilliflorum	Ms16	CIR53#2222016	22-22_16
Run7	Reunion	Bras Panon	Beauvallon	January, 2010	sorghum	Sorghum verticilliflorum	Ms16	CIR53#2222017	22-22_17
Run7	Reunion	Bras Panon	Beauvallon	January, 2010	sorghum	Sorghum verticilliflorum	Ms16	CIR53#2222018	22-22_18
Run7	Reunion	Bras Panon	Beauvallon	January, 2010	sorghum	Sorghum verticilliflorum	Ms16	CIR53#2222019	22-22_19
Run7	Reunion	Bras Panon	Beauvallon	January, 2010	sorghum	Sorghum verticilliflorum	Ms16	CIR53#2222020	22-22_20
Run7	Reunion	Bras Panon	Beauvallon	January, 2010	sorghum	Sorghum verticilliflorum	Ms16	CIR53#2222021	22-22_21
Run7	Reunion	Bras Panon	Beauvallon	January, 2010	sorghum	Sorghum verticilliflorum	Ms16	CIR53#2222022	22-22_22
Run7	Reunion	Bras Panon	Beauvallon	January, 2010	sorghum	Sorghum verticilliflorum	Ms16	CIR53#2222023	22-22_23
Run7	Reunion	Bras Panon	Beauvallon	January, 2010	sorghum	Sorghum verticilliflorum	Ms16	CIR53#2222025	22-22_25
Run7	Reunion	Bras Panon	Beauvallon	January, 2010	sorghum	Sorghum verticilliflorum	Ms16	CIR53#2222026	22-22_26
Run7	Reunion	Bras Panon	Beauvallon	January, 2010	sorghum	Sorghum verticilliflorum	Ms16	CIR53#2222027	22-22_27
Run7	Reunion	Bras Panon	Beauvallon	January, 2010	sorghum	Sorghum verticilliflorum	Ms16	CIR53#2222028	22-22_28
Run7	Reunion	Bras Panon	Beauvallon	January, 2010	sorghum	Sorghum verticilliflorum	Ms16	CIR53#2222029	22-22_29
Run7	Reunion	Bras Panon	Beauvallon	January, 2010	sorghum	Sorghum verticilliflorum	Ms16	CIR53#2222030	22-22_30
Run7	Reunion	Bras Panon	Beauvallon	January, 2010	sorghum	Sorghum verticilliflorum	Ms16	CIR53#2222031	22-22_31
Run7	Reunion	Bras Panon	Beauvallon	January, 2010	sorghum	Sorghum verticilliflorum	Ms16	CIR53#2222032	22-22_32
Run7	Reunion	Bras Panon	Beauvallon	January, 2010	sorghum	Sorghum verticilliflorum		CIR53#2222039	22_22_39	MSW036-13	KJ083180
Run7	Reunion	Bras Panon	Beauvallon	January, 2010	sorghum	Sorghum verticilliflorum		CIR53#2222038	22_22_38	MSW035-13	KJ083181
Run7	Reunion	Bras Panon	Beauvallon	January, 2010	sorghum	Sorghum verticilliflorum		CIR53#2222037	22_22_37	MSW034-13	KJ083182
Run7	Reunion	Bras Panon	Beauvallon	January, 2010	sorghum	Sorghum verticilliflorum		CIR53#2222036	22_22_36	MSW033-13	KJ083183
Run8	Reunion	Salazie	Mare à citrons	March, 2010	sorghum	Sorghum verticilliflorum	Ms15	CIR53#2212002	22-12_2
Run8	Reunion	Salazie	Mare à citrons	March, 2010	sorghum	Sorghum verticilliflorum	Ms15	CIR53#2212003	22-12_3
Run8	Reunion	Salazie	Mare à citrons	March, 2010	sorghum	Sorghum verticilliflorum	Ms15	CIR53#2212005	22-12_5
Run8	Reunion	Salazie	Mare à citrons	March, 2010	sorghum	Sorghum verticilliflorum	Ms15	CIR53#2212007	22-12_7
Run8	Reunion	Salazie	Mare à citrons	March, 2010	sorghum	Sorghum verticilliflorum	Ms15	CIR53#2212008	22-12_8
Run8	Reunion	Salazie	Mare à citrons	March, 2010	sorghum	Sorghum verticilliflorum	Ms15	CIR53#2212009	22-12_9
Run8	Reunion	Salazie	Mare à citrons	March, 2010	sorghum	Sorghum verticilliflorum	Ms15	CIR53#2212011	22-12_11	MSW026-13	KJ083190
Run8	Reunion	Salazie	Mare à citrons	March, 2010	sorghum	Sorghum verticilliflorum	Ms15	CIR53#2212012	22-12_12
Run8	Reunion	Salazie	Mare à citrons	March, 2010	sorghum	Sorghum verticilliflorum	Ms15	CIR53#2212013	22-12_13	MSW027-13	KJ083189
Run8	Reunion	Salazie	Mare à citrons	March, 2010	sorghum	Sorghum verticilliflorum	Ms15	CIR53#2212015	22-12_15
Run8	Reunion	Salazie	Mare à citrons	March, 2010	sorghum	Sorghum verticilliflorum	Ms15	CIR53#2212016	22-12_16
Run8	Reunion	Salazie	Mare à citrons	March, 2010	sorghum	Sorghum verticilliflorum	Ms15	CIR53#2212017	22-12_17
Run8	Reunion	Salazie	Mare à citrons	March, 2010	sorghum	Sorghum verticilliflorum	Ms15	CIR53#2212018	22-12_18
Run8	Reunion	Salazie	Mare à citrons	March, 2010	sorghum	Sorghum verticilliflorum	Ms15	CIR53#2212019	22-12_19
Run8	Reunion	Salazie	Mare à citrons	March, 2010	sorghum	Sorghum verticilliflorum	Ms15	CIR53#2212020	22-12_20
Run8	Reunion	Salazie	Mare à citrons	March, 2010	sorghum	Sorghum verticilliflorum	Ms15	CIR53#2212022	22-12_22
Run8	Reunion	Salazie	Mare à citrons	March, 2010	sorghum	Sorghum verticilliflorum	Ms15	CIR53#2212023	22-12_23
Run8	Reunion	Salazie	Mare à citrons	March, 2010	sorghum	Sorghum verticilliflorum	Ms15	CIR53#2212024	22-12_24
Run8	Reunion	Salazie	Mare à citrons	March, 2010	sorghum	Sorghum verticilliflorum	Ms15	CIR53#2212026	22-12_26
Run8	Reunion	Salazie	Mare à citrons	March, 2010	sorghum	Sorghum verticilliflorum	Ms15	CIR53#2212027	22-12_27
Run8	Reunion	Salazie	Mare à citrons	March, 2010	sorghum	Sorghum verticilliflorum	Ms15	CIR53#2212028	22-12_28
Run8	Reunion	Salazie	Mare à citrons	March, 2010	sorghum	Sorghum verticilliflorum	Ms15	CIR53#2212030	22-12_30
Run8	Reunion	Salazie	Mare à citrons	March, 2010	sorghum	Sorghum verticilliflorum	Ms15	CIR53#2212031	22-12_31
Run8	Reunion	Salazie	Mare à citrons	March, 2010	sorghum	Sorghum verticilliflorum	Ms15	CIR53#2212032	22-12_32
Run9	Reunion	Sainte Marie	eRcane Experimental Station	October, 2007	sugarcane	Saccharum sp.	Ms16	CIR53#2202001	22-2_1
Run9	Reunion	Sainte Marie	eRcane Experimental Station	October, 2007	sugarcane	Saccharum sp.	Ms16	CIR53#2202002	22-2_2
Run9	Reunion	Sainte Marie	eRcane Experimental Station	October, 2007	sugarcane	Saccharum sp.	Ms16	CIR53#2202003	22-2_3
Run9	Reunion	Sainte Marie	eRcane Experimental Station	October, 2007	sugarcane	Saccharum sp.	Ms16	CIR53#2202004	22-2_4
Run9	Reunion	Sainte Marie	eRcane Experimental Station	October, 2007	sugarcane	Saccharum sp.	Ms16	CIR53#2202005	22-2_5
Run9	Reunion	Sainte Marie	eRcane Experimental Station	October, 2007	sugarcane	Saccharum sp.	Ms16	CIR53#2202006	22-2_6
Run9	Reunion	Sainte Marie	eRcane Experimental Station	October, 2007	sugarcane	Saccharum sp.	Ms16	CIR53#2202007	22-2_7
Run9	Reunion	Sainte Marie	eRcane Experimental Station	October, 2007	sugarcane	Saccharum sp.	Ms16	CIR53#2202008	22-2_8
Run9	Reunion	Sainte Marie	eRcane Experimental Station	October, 2007	sugarcane	Saccharum sp.	Ms16	CIR53#2202009	22-2_9
Run9	Reunion	Sainte Marie	eRcane Experimental Station	October, 2007	sugarcane	Saccharum sp.	Ms16	CIR53#2202010	22-2_10
Run9	Reunion	Sainte Marie	eRcane Experimental Station	October, 2007	sugarcane	Saccharum sp.	Ms16	CIR53#2202011	22-2_11
Run9	Reunion	Sainte Marie	eRcane Experimental Station	October, 2007	sugarcane	Saccharum sp.	Ms16	CIR53#2202012	22-2_12
Run9	Reunion	Sainte Marie	eRcane Experimental Station	October, 2007	sugarcane	Saccharum sp.	Ms16	CIR53#2202013	22-2_13
Run9	Reunion	Sainte Marie	eRcane Experimental Station	October, 2007	sugarcane	Saccharum sp.	Ms16	CIR53#2202014	22-2_14
Run9	Reunion	Sainte Marie	eRcane Experimental Station	October, 2007	sugarcane	Saccharum sp.	Ms16	CIR53#2202015	22-2_15
Run9	Reunion	Sainte Marie	eRcane Experimental Station	October, 2007	sugarcane	Saccharum sp.	Ms16	CIR53#2202016	22-2_16
Run9	Reunion	Sainte Marie	eRcane Experimental Station	October, 2007	sugarcane	Saccharum sp.	Ms16	CIR53#2202017	22-2_17
Run9	Reunion	Sainte Marie	eRcane Experimental Station	October, 2007	sugarcane	Saccharum sp.	Ms16	CIR53#2202018	22-2_18
Run9	Reunion	Sainte Marie	eRcane Experimental Station	October, 2007	sugarcane	Saccharum sp.	Ms16	CIR53#2202019	22-2_19
Run9	Reunion	Sainte Marie	eRcane Experimental Station	October, 2007	sugarcane	Saccharum sp.	Ms16	CIR53#2202020	22-2_20
Run9	Reunion	Sainte Marie	eRcane Experimental Station	October, 2007	sugarcane	Saccharum sp.	Ms16	CIR53#2202021	22-2_21
Run9	Reunion	Sainte Marie	eRcane Experimental Station	October, 2007	sugarcane	Saccharum sp.	Ms11	CIR53#2202022	22-2_22
Run9	Reunion	Sainte Marie	eRcane Experimental Station	October, 2007	sugarcane	Saccharum sp.	Ms16	CIR53#2202023	22-2_23
Run9	Reunion	Sainte Marie	eRcane Experimental Station	October, 2007	sugarcane	Saccharum sp.	Ms16	CIR53#2202024	22-2_24
Run9	Reunion	Sainte Marie	eRcane Experimental Station	October, 2007	sugarcane	Saccharum sp.	Ms16	CIR53#2202025	22-2_25
Run9	Reunion	Sainte Marie	eRcane Experimental Station	October, 2007	sugarcane	Saccharum sp.	Ms16	CIR53#2202026	22-2_26
Run9	Reunion	Sainte Marie	eRcane Experimental Station	October, 2007	sugarcane	Saccharum sp.	Ms16	CIR53#2202027	22-2_27
Run9	Reunion	Sainte Marie	eRcane Experimental Station	October, 2007	sugarcane	Saccharum sp.	Ms16	CIR53#2202028	22-2_28
Run9	Reunion	Sainte Marie	eRcane Experimental Station	October, 2007	sugarcane	Saccharum sp.	Ms16	CIR53#2202029	22-2_29
Run9	Reunion	Sainte Marie	eRcane Experimental Station	October, 2007	sugarcane	Saccharum sp.	Ms16	CIR53#2202030	22-2_30
Run9	Reunion	Sainte Marie	eRcane Experimental Station	October, 2007	sugarcane	Saccharum sp.	Ms16	CIR53#2202031	22-2_31
Run9	Reunion	Sainte Marie	eRcane Experimental Station	October, 2007	sugarcane	Saccharum sp.	Ms16	CIR53#2202032	22-2_32
Run10	Reunion	Sainte Marie	eRcane Experimental Station	October, 2007	sugarcane	Saccharum sp.	Ms16	CIR53#2221001	22-21_1
Run10	Reunion	Sainte Marie	eRcane Experimental Station	October, 2007	sugarcane	Saccharum sp.	Ms16	CIR53#2221002	22-21_2
Run10	Reunion	Sainte Marie	eRcane Experimental Station	October, 2007	sugarcane	Saccharum sp.	Ms16	CIR53#2221003	22-21_3
Run10	Reunion	Sainte Marie	eRcane Experimental Station	October, 2007	sugarcane	Saccharum sp.	Ms16	CIR53#2221004	22-21_4
Run10	Reunion	Sainte Marie	eRcane Experimental Station	October, 2007	sugarcane	Saccharum sp.	Ms16	CIR53#2221005	22-21_5
Run10	Reunion	Sainte Marie	eRcane Experimental Station	October, 2007	sugarcane	Saccharum sp.	Ms16	CIR53#2221006	22-21_6
Run10	Reunion	Sainte Marie	eRcane Experimental Station	October, 2007	sugarcane	Saccharum sp.	Ms16	CIR53#2221007	22-21_7
Run10	Reunion	Sainte Marie	eRcane Experimental Station	October, 2007	sugarcane	Saccharum sp.	Ms16	CIR53#2221008	22-21_8
Run10	Reunion	Sainte Marie	eRcane Experimental Station	October, 2007	sugarcane	Saccharum sp.	Ms16	CIR53#2221009	22-21_9
Run10	Reunion	Sainte Marie	eRcane Experimental Station	October, 2007	sugarcane	Saccharum sp.	Ms16	CIR53#2221010	22-21_10
Run10	Reunion	Sainte Marie	eRcane Experimental Station	October, 2007	sugarcane	Saccharum sp.	Ms16	CIR53#2221011	22-21_11
Run10	Reunion	Sainte Marie	eRcane Experimental Station	October, 2007	sugarcane	Saccharum sp.	Ms16	CIR53#2221012	22-21_12
Run10	Reunion	Sainte Marie	eRcane Experimental Station	October, 2007	sugarcane	Saccharum sp.	Ms16	CIR53#2221013	22-21_13
Run10	Reunion	Sainte Marie	eRcane Experimental Station	October, 2007	sugarcane	Saccharum sp.	Ms16	CIR53#2221014	22-21_14
Run10	Reunion	Sainte Marie	eRcane Experimental Station	October, 2007	sugarcane	Saccharum sp.	Ms16	CIR53#2221015	22-21_15
Run10	Reunion	Sainte Marie	eRcane Experimental Station	October, 2007	sugarcane	Saccharum sp.	Ms16	CIR53#2221016	22-21_16
Run10	Reunion	Sainte Marie	eRcane Experimental Station	October, 2007	sugarcane	Saccharum sp.	Ms16	CIR53#2221017	22-21_17
Run10	Reunion	Sainte Marie	eRcane Experimental Station	October, 2007	sugarcane	Saccharum sp.	Ms16	CIR53#2221018	22-21_18
Run10	Reunion	Sainte Marie	eRcane Experimental Station	October, 2007	sugarcane	Saccharum sp.	Ms21	CIR53#2221019	22-21_19
Run10	Reunion	Sainte Marie	eRcane Experimental Station	October, 2007	sugarcane	Saccharum sp.	Ms21	CIR53#2221021	22-21_21
Run10	Reunion	Sainte Marie	eRcane Experimental Station	October, 2007	sugarcane	Saccharum sp.	Ms16	CIR53#2221023	22-21_23
Run10	Reunion	Sainte Marie	eRcane Experimental Station	October, 2007	sugarcane	Saccharum sp.	Ms16	CIR53#2221024	22-21_24
Run10	Reunion	Sainte Marie	eRcane Experimental Station	October, 2007	sugarcane	Saccharum sp.	Ms16	CIR53#2221025	22-21_25
Run10	Reunion	Sainte Marie	eRcane Experimental Station	October, 2007	sugarcane	Saccharum sp.	Ms16	CIR53#2221026	22-21_26
Run10	Reunion	Sainte Marie	eRcane Experimental Station	October, 2007	sugarcane	Saccharum sp.	Ms16	CIR53#2221027	22-21_27
Run10	Reunion	Sainte Marie	eRcane Experimental Station	October, 2007	sugarcane	Saccharum sp.	Ms16	CIR53#2221030	22-21_30
Run10	Reunion	Sainte Marie	eRcane Experimental Station	October, 2007	sugarcane	Saccharum sp.	Ms16	CIR53#2221031	22-21_31
Run10	Reunion	Sainte Marie	eRcane Experimental Station	October, 2007	sugarcane	Saccharum sp.	Ms19	CIR53#2221032	22-21_32
Run11	Reunion	Saint Leu	Maduran	April, 2008	sugarcane	Saccharum sp.	Ms12	CIR53#2201001	22-1_1
Run11	Reunion	Saint Leu	Maduran	April, 2008	sugarcane	Saccharum sp.	Ms16	CIR53#2201002	22-1_2
Run11	Reunion	Saint Leu	Maduran	April, 2008	sugarcane	Saccharum sp.	Ms12	CIR53#2201003	22-1_3
Run11	Reunion	Saint Leu	Maduran	April, 2008	sugarcane	Saccharum sp.	Ms16	CIR53#2201004	22-1_4
Run11	Reunion	Saint Leu	Maduran	April, 2008	sugarcane	Saccharum sp.	Ms16	CIR53#2201005	22-1_5
Run11	Reunion	Saint Leu	Maduran	April, 2008	sugarcane	Saccharum sp.	Ms12	CIR53#2201006	22-1_6
Run11	Reunion	Saint Leu	Maduran	April, 2008	sugarcane	Saccharum sp.	Ms16	CIR53#2201007	22-1_7
Run11	Reunion	Saint Leu	Maduran	April, 2008	sugarcane	Saccharum sp.	Ms12	CIR53#2201008	22-1_8
Run11	Reunion	Saint Leu	Maduran	April, 2008	sugarcane	Saccharum sp.	Ms16	CIR53#2201009	22-1_9
Run11	Reunion	Saint Leu	Maduran	April, 2008	sugarcane	Saccharum sp.	Ms12	CIR53#2201010	22-1_10
Run11	Reunion	Saint Leu	Maduran	April, 2008	sugarcane	Saccharum sp.	Ms16	CIR53#2201011	22-1_11
Run11	Reunion	Saint Leu	Maduran	April, 2008	sugarcane	Saccharum sp.	Ms16	CIR53#2201012	22-1_12
Run11	Reunion	Saint Leu	Maduran	April, 2008	sugarcane	Saccharum sp.	Ms16	CIR53#2201013	22-1_13
Run11	Reunion	Saint Leu	Maduran	April, 2008	sugarcane	Saccharum sp.	Ms16	CIR53#2201014	22-1_14
Run11	Reunion	Saint Leu	Maduran	April, 2008	sugarcane	Saccharum sp.	Ms12	CIR53#2201015	22-1_15
Run11	Reunion	Saint Leu	Maduran	April, 2008	sugarcane	Saccharum sp.	Ms16	CIR53#2201016	22-1_16
Run11	Reunion	Saint Leu	Maduran	April, 2008	sugarcane	Saccharum sp.	Ms16	CIR53#2201017	22-1_17
Run11	Reunion	Saint Leu	Maduran	April, 2008	sugarcane	Saccharum sp.	Ms16	CIR53#2201018	22-1_18
Run11	Reunion	Saint Leu	Maduran	April, 2008	sugarcane	Saccharum sp.	Ms12	CIR53#2201019	22-1_19
Run11	Reunion	Saint Leu	Maduran	April, 2008	sugarcane	Saccharum sp.	Ms12	CIR53#2201020	22-1_20
Run11	Reunion	Saint Leu	Maduran	April, 2008	sugarcane	Saccharum sp.	Ms16	CIR53#2201021	22-1_21
Run11	Reunion	Saint Leu	Maduran	April, 2008	sugarcane	Saccharum sp.	Ms16	CIR53#2201022	22-1_22
Run11	Reunion	Saint Leu	Maduran	April, 2008	sugarcane	Saccharum sp.	Ms16	CIR53#2201023	22-1_23
Run11	Reunion	Saint Leu	Maduran	April, 2008	sugarcane	Saccharum sp.	Ms12	CIR53#2201024	22-1_24
Run11	Reunion	Saint Leu	Maduran	April, 2008	sugarcane	Saccharum sp.	Ms16	CIR53#2201025	22-1_25
Run11	Reunion	Saint Leu	Maduran	April, 2008	sugarcane	Saccharum sp.	Ms12	CIR53#2201026	22-1_26
Run11	Reunion	Saint Leu	Maduran	April, 2008	sugarcane	Saccharum sp.	Ms16	CIR53#2201027	22-1_27
Run11	Reunion	Saint Leu	Maduran	April, 2008	sugarcane	Saccharum sp.	Ms16	CIR53#2201028	22-1_28
Run11	Reunion	Saint Leu	Maduran	April, 2008	sugarcane	Saccharum sp.	Ms16	CIR53#2201029	22-1_29
Run11	Reunion	Saint Leu	Maduran	April, 2008	sugarcane	Saccharum sp.	Ms12	CIR53#2201030	22-1_30
Run11	Reunion	Saint Leu	Maduran	April, 2008	sugarcane	Saccharum sp.	Ms12	CIR53#2201031	22-1_31
Run11	Reunion	Saint Leu	Maduran	April, 2008	sugarcane	Saccharum sp.	Ms16	CIR53#2201032	22-1_32
Run12	Reunion	Petite Île		April, 2008	sugarcane	Saccharum sp.	Ms11	CIR53#2205001	22-5_1
Run12	Reunion	Petite Île		April, 2008	sugarcane	Saccharum sp.	Ms12	CIR53#2205002	22-5_2
Run12	Reunion	Petite Île		April, 2008	sugarcane	Saccharum sp.	Ms12	CIR53#2205003	22-5_3	MSW025-13	KJ083191
Run12	Reunion	Petite Île		April, 2008	sugarcane	Saccharum sp.	Ms11	CIR53#2205004	22-5_4
Run12	Reunion	Petite Île		April, 2008	sugarcane	Saccharum sp.	Ms16	CIR53#2205005	22-5_5
Run12	Reunion	Petite Île		April, 2008	sugarcane	Saccharum sp.	Ms11	CIR53#2205006	22-5_6
Run12	Reunion	Petite Île		April, 2008	sugarcane	Saccharum sp.	Ms12	CIR53#2205007	22-5_7
Run12	Reunion	Petite Île		April, 2008	sugarcane	Saccharum sp.	Ms11	CIR53#2205008	22-5_8
Run12	Reunion	Petite Île		April, 2008	sugarcane	Saccharum sp.	Ms16	CIR53#2205009	22-5_9
Run12	Reunion	Petite Île		April, 2008	sugarcane	Saccharum sp.	Ms11	CIR53#2205010	22-5_10
Run12	Reunion	Petite Île		April, 2008	sugarcane	Saccharum sp.	Ms11	CIR53#2205011	22-5_11
Run12	Reunion	Petite Île		April, 2008	sugarcane	Saccharum sp.	Ms11	CIR53#2205012	22-5_12
Run12	Reunion	Petite Île		April, 2008	sugarcane	Saccharum sp.	Ms11	CIR53#2205013	22-5_13
Run12	Reunion	Petite Île		April, 2008	sugarcane	Saccharum sp.	Ms11	CIR53#2205014	22-5_14
Run12	Reunion	Petite Île		April, 2008	sugarcane	Saccharum sp.	Ms11	CIR53#2205015	22-5_15
Run12	Reunion	Petite Île		April, 2008	sugarcane	Saccharum sp.	Ms12	CIR53#2205016	22-5_16
Run12	Reunion	Petite Île		April, 2008	sugarcane	Saccharum sp.	Ms11	CIR53#2205017	22-5_17
Run12	Reunion	Petite Île		April, 2008	sugarcane	Saccharum sp.	Ms11	CIR53#2205018	22-5_18
Run12	Reunion	Petite Île		April, 2008	sugarcane	Saccharum sp.	Ms11	CIR53#2205019	22-5_19
Run12	Reunion	Petite Île		April, 2008	sugarcane	Saccharum sp.	Ms16	CIR53#2205020	22-5_20
Run12	Reunion	Petite Île		April, 2008	sugarcane	Saccharum sp.	Ms11	CIR53#2205021	22-5_21
Run12	Reunion	Petite Île		April, 2008	sugarcane	Saccharum sp.	Ms11	CIR53#2205022	22-5_22
Run12	Reunion	Petite Île		April, 2008	sugarcane	Saccharum sp.	Ms16	CIR53#2205023	22-5_23
Run12	Reunion	Petite Île		April, 2008	sugarcane	Saccharum sp.	Ms12	CIR53#2205024	22-5_24
Run12	Reunion	Petite Île		April, 2008	sugarcane	Saccharum sp.	Ms11	CIR53#2205025	22-5_25
Run12	Reunion	Petite Île		April, 2008	sugarcane	Saccharum sp.	Ms12	CIR53#2205026	22-5_26
Run12	Reunion	Petite Île		April, 2008	sugarcane	Saccharum sp.	Ms12	CIR53#2205027	22-5_27
Run12	Reunion	Petite Île		April, 2008	sugarcane	Saccharum sp.	Ms16	CIR53#2205029	22-5_29
Run12	Reunion	Petite Île		April, 2008	sugarcane	Saccharum sp.	Ms11	CIR53#2205031	22-5_31
Run12	Reunion	Petite Île		April, 2008	sugarcane	Saccharum sp.	Ms11	CIR53#2205032	22-5_32
Run13	Reunion	Saint Philippe	eRcane Experimental Station	April, 2008	sugarcane	Saccharum sp.	Ms11	CIR53#2218001	22-18_1
Run13	Reunion	Saint Philippe	eRcane Experimental Station	April, 2008	sugarcane	Saccharum sp.	Ms11	CIR53#2218002	22-18_2
Run13	Reunion	Saint Philippe	eRcane Experimental Station	April, 2008	sugarcane	Saccharum sp.	Ms11	CIR53#2218003	22-18_3
Run13	Reunion	Saint Philippe	eRcane Experimental Station	April, 2008	sugarcane	Saccharum sp.	Ms11	CIR53#2218004	22-18_4
Run13	Reunion	Saint Philippe	eRcane Experimental Station	April, 2008	sugarcane	Saccharum sp.	Ms11	CIR53#2218005	22-18_5
Run13	Reunion	Saint Philippe	eRcane Experimental Station	April, 2008	sugarcane	Saccharum sp.	Ms11	CIR53#2218006	22-18_6
Run13	Reunion	Saint Philippe	eRcane Experimental Station	April, 2008	sugarcane	Saccharum sp.	Ms11	CIR53#2218007	22-18_7
Run13	Reunion	Saint Philippe	eRcane Experimental Station	April, 2008	sugarcane	Saccharum sp.	Ms11	CIR53#2218008	22-18_8
Run13	Reunion	Saint Philippe	eRcane Experimental Station	April, 2008	sugarcane	Saccharum sp.	Ms11	CIR53#2218009	22-18_9
Run13	Reunion	Saint Philippe	eRcane Experimental Station	April, 2008	sugarcane	Saccharum sp.	Ms11	CIR53#2218010	22-18_10
Run13	Reunion	Saint Philippe	eRcane Experimental Station	April, 2008	sugarcane	Saccharum sp.	Ms11	CIR53#2218011	22-18_11
Run13	Reunion	Saint Philippe	eRcane Experimental Station	April, 2008	sugarcane	Saccharum sp.	Ms11	CIR53#2218012	22-18_12
Run13	Reunion	Saint Philippe	eRcane Experimental Station	April, 2008	sugarcane	Saccharum sp.	Ms11	CIR53#2218013	22-18_13
Run13	Reunion	Saint Philippe	eRcane Experimental Station	April, 2008	sugarcane	Saccharum sp.	Ms22	CIR53#2218014	22-18_14	MSW030-13	KJ083186
Run13	Reunion	Saint Philippe	eRcane Experimental Station	April, 2008	sugarcane	Saccharum sp.	Ms11	CIR53#2218015	22-18_15
Run13	Reunion	Saint Philippe	eRcane Experimental Station	April, 2008	sugarcane	Saccharum sp.	Ms11	CIR53#2218016	22-18_16
Run13	Reunion	Saint Philippe	eRcane Experimental Station	April, 2008	sugarcane	Saccharum sp.	Ms23	CIR53#2218017	22-18_17
Run13	Reunion	Saint Philippe	eRcane Experimental Station	April, 2008	sugarcane	Saccharum sp.	Ms22	CIR53#2218018	22-18_18
Run13	Reunion	Saint Philippe	eRcane Experimental Station	April, 2008	sugarcane	Saccharum sp.	Ms11	CIR53#2218019	22-18_19
Run13	Reunion	Saint Philippe	eRcane Experimental Station	April, 2008	sugarcane	Saccharum sp.	Ms11	CIR53#2218020	22-18_20
Run13	Reunion	Saint Philippe	eRcane Experimental Station	April, 2008	sugarcane	Saccharum sp.	Ms11	CIR53#2218021	22-18_21
Run13	Reunion	Saint Philippe	eRcane Experimental Station	April, 2008	sugarcane	Saccharum sp.	Ms22	CIR53#2218022	22-18_22
Run13	Reunion	Saint Philippe	eRcane Experimental Station	April, 2008	sugarcane	Saccharum sp.	Ms11	CIR53#2218023	22-18_23
Run13	Reunion	Saint Philippe	eRcane Experimental Station	April, 2008	sugarcane	Saccharum sp.	Ms22	CIR53#2218024	22-18_24
Run13	Reunion	Saint Philippe	eRcane Experimental Station	April, 2008	sugarcane	Saccharum sp.	Ms11	CIR53#2218025	22-18_25
Run13	Reunion	Saint Philippe	eRcane Experimental Station	April, 2008	sugarcane	Saccharum sp.	Ms23	CIR53#2218026	22-18_26
Run13	Reunion	Saint Philippe	eRcane Experimental Station	April, 2008	sugarcane	Saccharum sp.	Ms11	CIR53#2218027	22-18_27
Run13	Reunion	Saint Philippe	eRcane Experimental Station	April, 2008	sugarcane	Saccharum sp.	Ms11	CIR53#2218028	22-18_28
Run13	Reunion	Saint Philippe	eRcane Experimental Station	April, 2008	sugarcane	Saccharum sp.	Ms22	CIR53#2218029	22-18_29
Run13	Reunion	Saint Philippe	eRcane Experimental Station	April, 2008	sugarcane	Saccharum sp.	Ms11	CIR53#2218030	22-18_30
Run13	Reunion	Saint Philippe	eRcane Experimental Station	April, 2008	sugarcane	Saccharum sp.	Ms22	CIR53#2218031	22-18_31
Run13	Reunion	Saint Philippe	eRcane Experimental Station	April, 2008	sugarcane	Saccharum sp.	Ms11	CIR53#2218032	22-18_32
Run14	Reunion	Piton Sainte Rose		April, 2008	sugarcane	Saccharum sp.	Ms16	CIR53#2228001	22-28_1
Run14	Reunion	Piton Sainte Rose		April, 2008	sugarcane	Saccharum sp.	Ms16	CIR53#2228002	22-28_2
Run14	Reunion	Piton Sainte Rose		April, 2008	sugarcane	Saccharum sp.	Ms16	CIR53#2228003	22-28_3
Run14	Reunion	Piton Sainte Rose		April, 2008	sugarcane	Saccharum sp.	Ms16	CIR53#2228004	22-28_4
Run14	Reunion	Piton Sainte Rose		April, 2008	sugarcane	Saccharum sp.	Ms11	CIR53#2228005	22-28_5
Run14	Reunion	Piton Sainte Rose		April, 2008	sugarcane	Saccharum sp.	Ms16	CIR53#2228006	22-28_6
Run14	Reunion	Piton Sainte Rose		April, 2008	sugarcane	Saccharum sp.	Ms16	CIR53#2228007	22-28_7
Run14	Reunion	Piton Sainte Rose		April, 2008	sugarcane	Saccharum sp.	Ms16	CIR53#2228008	22-28_8
Run14	Reunion	Piton Sainte Rose		April, 2008	sugarcane	Saccharum sp.	Ms16	CIR53#2228009	22-28_9
Run14	Reunion	Piton Sainte Rose		April, 2008	sugarcane	Saccharum sp.	Ms16	CIR53#2228010	22-28_10
Run14	Reunion	Piton Sainte Rose		April, 2008	sugarcane	Saccharum sp.	Ms11	CIR53#2228011	22-28_11
Run14	Reunion	Piton Sainte Rose		April, 2008	sugarcane	Saccharum sp.	Ms16	CIR53#2228012	22-28_12
Run14	Reunion	Piton Sainte Rose		April, 2008	sugarcane	Saccharum sp.	Ms16	CIR53#2228013	22-28_13
Run14	Reunion	Piton Sainte Rose		April, 2008	sugarcane	Saccharum sp.	Ms11	CIR53#2228014	22-28_14
Run14	Reunion	Piton Sainte Rose		April, 2008	sugarcane	Saccharum sp.	Ms16	CIR53#2228015	22-28_15
Run14	Reunion	Piton Sainte Rose		April, 2008	sugarcane	Saccharum sp.	Ms11	CIR53#2228016	22-28_16
Run14	Reunion	Piton Sainte Rose		April, 2008	sugarcane	Saccharum sp.	Ms11	CIR53#2228017	22-28_17
Run14	Reunion	Piton Sainte Rose		April, 2008	sugarcane	Saccharum sp.	Ms11	CIR53#2228019	22-28_19
Run14	Reunion	Piton Sainte Rose		April, 2008	sugarcane	Saccharum sp.	Ms16	CIR53#2228020	22-28_20
Run14	Reunion	Piton Sainte Rose		April, 2008	sugarcane	Saccharum sp.	Ms16	CIR53#2228021	22-28_21
Run14	Reunion	Piton Sainte Rose		April, 2008	sugarcane	Saccharum sp.	Ms16	CIR53#2228022	22-28_22
Run14	Reunion	Piton Sainte Rose		April, 2008	sugarcane	Saccharum sp.	Ms16	CIR53#2228023	22-28_23
Run14	Reunion	Piton Sainte Rose		April, 2008	sugarcane	Saccharum sp.	Ms16	CIR53#2228024	22-28_24
Run14	Reunion	Piton Sainte Rose		April, 2008	sugarcane	Saccharum sp.	Ms16	CIR53#2228025	22-28_25
Run14	Reunion	Piton Sainte Rose		April, 2008	sugarcane	Saccharum sp.	Ms11	CIR53#2228026	22-28_26
Run14	Reunion	Piton Sainte Rose		April, 2008	sugarcane	Saccharum sp.	Ms16	CIR53#2228027	22-28_27
Run14	Reunion	Piton Sainte Rose		April, 2008	sugarcane	Saccharum sp.	Ms16	CIR53#2228028	22-28_28
Run14	Reunion	Piton Sainte Rose		April, 2008	sugarcane	Saccharum sp.	Ms16	CIR53#2228029	22-28_29
Run14	Reunion	Piton Sainte Rose		April, 2008	sugarcane	Saccharum sp.	Ms11	CIR53#2228030	22-28_30
Run14	Reunion	Piton Sainte Rose		April, 2008	sugarcane	Saccharum sp.	Ms16	CIR53#2228031	22-28_31
Run14	Reunion	Piton Sainte Rose		April, 2008	sugarcane	Saccharum sp.	Ms16	CIR53#2228032	22-28_32
Run15	Reunion	Entre Deux	Bras Long school	June, 2008	sorghum	Sorghum verticilliflorum	Ms17	CIR53#6301902	EDE1_2
Run15	Reunion	Entre Deux	Bras Long school	June, 2008	sorghum	Sorghum verticilliflorum	Ms17	CIR53#6301919	EDE1_19	MSW107-13	KJ083109
Run15	Reunion	Entre Deux	Bras Long school	June, 2008	sorghum	Sorghum verticilliflorum	Ms18	CIR53#6301923	EDE1_23
Run16	Reunion	La Saline les Hauts	Vue Belle	January, 2010	sugarcane	Saccharum sp.	Ms14	CIR53#7801001	78-1_1
Run16	Reunion	La Saline les Hauts	Vue Belle	January, 2010	sugarcane	Saccharum sp.	Ms16	CIR53#7801003	78-1_3
Run16	Reunion	La Saline les Hauts	Vue Belle	January, 2010	sugarcane	Saccharum sp.	Ms11	CIR53#7801004	78-1_4
Run16	Reunion	La Saline les Hauts	Vue Belle	January, 2010	sugarcane	Saccharum sp.	Ms11	CIR53#7801005	78-1_5
Run16	Reunion	La Saline les Hauts	Vue Belle	January, 2010	sugarcane	Saccharum sp.	Ms16	CIR53#7801006	78-1_6
Run16	Reunion	La Saline les Hauts	Vue Belle	January, 2010	sugarcane	Saccharum sp.	Ms14	CIR53#7801007	78-1_7	MSW098-13	KJ083118
Run16	Reunion	La Saline les Hauts	Vue Belle	January, 2010	sugarcane	Saccharum sp.	Ms14	CIR53#7801008	78-1_8
Run16	Reunion	La Saline les Hauts	Vue Belle	January, 2010	sugarcane	Saccharum sp.	Ms14	CIR53#7801017	78-1_17
Run16	Reunion	La Saline les Hauts	Vue Belle	January, 2010	sugarcane	Saccharum sp.	Ms11	CIR53#7801018	78-1_18
Run16	Reunion	La Saline les Hauts	Vue Belle	January, 2010	sugarcane	Saccharum sp.	Ms11	CIR53#7801019	78-1_19
Run16	Reunion	La Saline les Hauts	Vue Belle	January, 2010	sugarcane	Saccharum sp.	Ms11	CIR53#7801020	78-1_20
Run16	Reunion	La Saline les Hauts	Vue Belle	January, 2010	sugarcane	Saccharum sp.	Ms11	CIR53#7801021	78-1_21
Run16	Reunion	La Saline les Hauts	Vue Belle	January, 2010	sugarcane	Saccharum sp.	Ms14	CIR53#7801022	78-1_22
Run16	Reunion	La Saline les Hauts	Vue Belle	January, 2010	sugarcane	Saccharum sp.	Ms11	CIR53#7801023	78-1_23
Run16	Reunion	La Saline les Hauts	Vue Belle	January, 2010	sugarcane	Saccharum sp.	Ms11	CIR53#7801024	78-1_24
Run16	Reunion	La Saline les Hauts	Vue Belle	January, 2010	sugarcane	Saccharum sp.	Ms11	CIR53#7801025	78-1_25
Run16	Reunion	La Saline les Hauts	Vue Belle	January, 2010	sugarcane	Saccharum sp.	Ms16	CIR53#7801026	78-1_26
Run16	Reunion	La Saline les Hauts	Vue Belle	January, 2010	sugarcane	Saccharum sp.	Ms11	CIR53#7801027	78-1_27
Run16	Reunion	La Saline les Hauts	Vue Belle	January, 2010	sugarcane	Saccharum sp.	Ms16	CIR53#7801028	78-1_28
Run16	Reunion	La Saline les Hauts	Vue Belle	January, 2010	sugarcane	Saccharum sp.	Ms11	CIR53#7801029	78-1_29
Run16	Reunion	La Saline les Hauts	Vue Belle	January, 2010	sugarcane	Saccharum sp.	Ms16	CIR53#7801031	78-1_31
Run16	Reunion	La Saline les Hauts	Vue Belle	January, 2010	sugarcane	Saccharum sp.	Ms11	CIR53#7801032	78-1_32
Run17	Reunion	Salazie	Mare à Citrons - Le verger	March, 2010	sugarcane	Saccharum sp.	Ms11	CIR53#2203001	22-3_1
Run17	Reunion	Salazie	Mare à Citrons - Le verger	March, 2010	sugarcane	Saccharum sp.	Ms11	CIR53#2203002	22-3_2
Run17	Reunion	Salazie	Mare à Citrons - Le verger	March, 2010	sugarcane	Saccharum sp.	Ms11	CIR53#2203003	22-3_3
Run17	Reunion	Salazie	Mare à Citrons - Le verger	March, 2010	sugarcane	Saccharum sp.	Ms11	CIR53#2203004	22-3_4
Run17	Reunion	Salazie	Mare à Citrons - Le verger	March, 2010	sugarcane	Saccharum sp.	Ms11	CIR53#2203005	22-3_5
Run17	Reunion	Salazie	Mare à Citrons - Le verger	March, 2010	sugarcane	Saccharum sp.	Ms11	CIR53#2203006	22-3_6
Run17	Reunion	Salazie	Mare à Citrons - Le verger	March, 2010	sugarcane	Saccharum sp.	Ms16	CIR53#2203007	22-3_7	MSW022-13	KJ083194
Run17	Reunion	Salazie	Mare à Citrons - Le verger	March, 2010	sugarcane	Saccharum sp.	Ms16	CIR53#2203008	22-3_8
Run17	Reunion	Salazie	Mare à Citrons - Le verger	March, 2010	sugarcane	Saccharum sp.	Ms11	CIR53#2203009	22-3_9
Run17	Reunion	Salazie	Mare à Citrons - Le verger	March, 2010	sugarcane	Saccharum sp.	Ms11	CIR53#2203010	22-3_10
Run17	Reunion	Salazie	Mare à Citrons - Le verger	March, 2010	sugarcane	Saccharum sp.	Ms11	CIR53#2203011	22-3_11
Run17	Reunion	Salazie	Mare à Citrons - Le verger	March, 2010	sugarcane	Saccharum sp.	Ms11	CIR53#2203012	22-3_12
Run17	Reunion	Salazie	Mare à Citrons - Le verger	March, 2010	sugarcane	Saccharum sp.	Ms11	CIR53#2203013	22-3_13
Run17	Reunion	Salazie	Mare à Citrons - Le verger	March, 2010	sugarcane	Saccharum sp.	Ms11	CIR53#2203014	22-3_14
Run17	Reunion	Salazie	Mare à Citrons - Le verger	March, 2010	sugarcane	Saccharum sp.	Ms16	CIR53#2203015	22-3_15
Run17	Reunion	Salazie	Mare à Citrons - Le verger	March, 2010	sugarcane	Saccharum sp.	Ms11	CIR53#2203016	22-3_16
Run17	Reunion	Salazie	Mare à Citrons - Le verger	March, 2010	sugarcane	Saccharum sp.	Ms11	CIR53#2203017	22-3_17
Run17	Reunion	Salazie	Mare à Citrons - Le verger	March, 2010	sugarcane	Saccharum sp.	Ms11	CIR53#2203018	22-3_18
Run17	Reunion	Salazie	Mare à Citrons - Le verger	March, 2010	sugarcane	Saccharum sp.	Ms16	CIR53#2203019	22-3_19
Run17	Reunion	Salazie	Mare à Citrons - Le verger	March, 2010	sugarcane	Saccharum sp.	Ms11	CIR53#2203020	22-3_20
Run17	Reunion	Salazie	Mare à Citrons - Le verger	March, 2010	sugarcane	Saccharum sp.	Ms11	CIR53#2203021	22-3_21
Run17	Reunion	Salazie	Mare à Citrons - Le verger	March, 2010	sugarcane	Saccharum sp.	Ms11	CIR53#2203022	22-3_22
Run17	Reunion	Salazie	Mare à Citrons - Le verger	March, 2010	sugarcane	Saccharum sp.	Ms11	CIR53#2203023	22-3_23
Run17	Reunion	Salazie	Mare à Citrons - Le verger	March, 2010	sugarcane	Saccharum sp.	Ms11	CIR53#2203024	22-3_24
Run17	Reunion	Salazie	Mare à Citrons - Le verger	March, 2010	sugarcane	Saccharum sp.	Ms11	CIR53#2203025	22-3_25
Run17	Reunion	Salazie	Mare à Citrons - Le verger	March, 2010	sugarcane	Saccharum sp.	Ms11	CIR53#2203026	22-3_26
Run17	Reunion	Salazie	Mare à Citrons - Le verger	March, 2010	sugarcane	Saccharum sp.	Ms11	CIR53#2203027	22-3_27
Run17	Reunion	Salazie	Mare à Citrons - Le verger	March, 2010	sugarcane	Saccharum sp.	Ms11	CIR53#2203028	22-3_28
Run17	Reunion	Salazie	Mare à Citrons - Le verger	March, 2010	sugarcane	Saccharum sp.	Ms11	CIR53#2203029	22-3_29
Run17	Reunion	Salazie	Mare à Citrons - Le verger	March, 2010	sugarcane	Saccharum sp.	Ms11	CIR53#2203030	22-3_30
Run17	Reunion	Salazie	Mare à Citrons - Le verger	March, 2010	sugarcane	Saccharum sp.	Ms16	CIR53#2203031	22-3_31	MSW023-13	KJ083193
Run17	Reunion	Salazie	Mare à Citrons - Le verger	March, 2010	sugarcane	Saccharum sp.	Ms11	CIR53#2203032	22-3_32
Run17	Reunion	Salazie	Mare à Citrons - Le verger	March, 2010	sugarcane	Saccharum sp.		CIR53#2203901	22_3_1G	MSW020-13	KJ083196
Run17	Reunion	Salazie	Mare à Citrons - Le verger	March, 2010	sugarcane	Saccharum sp.		CIR53#2203902	22_3_2P	MSW021-13	KJ083195
Run18	Reunion	Grande Chaloupe	Route Corniche	January, 2010	sorghum	Sorghum verticilliflorum	Ms15	CIR53#2206001	22-6_1
Run18	Reunion	Grande Chaloupe	Route Corniche	January, 2010	sorghum	Sorghum verticilliflorum	Ms15	CIR53#2206002	22-6_2
Run18	Reunion	Grande Chaloupe	Route Corniche	January, 2010	sorghum	Sorghum verticilliflorum	Ms15	CIR53#2206003	22-6_3
Run18	Reunion	Grande Chaloupe	Route Corniche	January, 2010	sorghum	Sorghum verticilliflorum	Ms15	CIR53#2206004	22-6_4
Run18	Reunion	Grande Chaloupe	Route Corniche	January, 2010	sorghum	Sorghum verticilliflorum	Ms15	CIR53#2206005	22-6_5
Run18	Reunion	Grande Chaloupe	Route Corniche	January, 2010	sorghum	Sorghum verticilliflorum	Ms15	CIR53#2206006	22-6_6
Run18	Reunion	Grande Chaloupe	Route Corniche	January, 2010	sorghum	Sorghum verticilliflorum	Ms15	CIR53#2206007	22-6_7
Run18	Reunion	Grande Chaloupe	Route Corniche	January, 2010	sorghum	Sorghum verticilliflorum	Ms15	CIR53#2206008	22-6_8
Run18	Reunion	Grande Chaloupe	Route Corniche	January, 2010	sorghum	Sorghum verticilliflorum	Ms15	CIR53#2206009	22-6_9
Run18	Reunion	Grande Chaloupe	Route Corniche	January, 2010	sorghum	Sorghum verticilliflorum	Ms15	CIR53#2206010	22-6_10
Run18	Reunion	Grande Chaloupe	Route Corniche	January, 2010	sorghum	Sorghum verticilliflorum	Ms15	CIR53#2206011	22-6_11
Run18	Reunion	Grande Chaloupe	Route Corniche	January, 2010	sorghum	Sorghum verticilliflorum	Ms15	CIR53#2206012	22-6_12
Run18	Reunion	Grande Chaloupe	Route Corniche	January, 2010	sorghum	Sorghum verticilliflorum	Ms15	CIR53#2206013	22-6_13
Run18	Reunion	Grande Chaloupe	Route Corniche	January, 2010	sorghum	Sorghum verticilliflorum	Ms15	CIR53#2206014	22-6_14
Run18	Reunion	Grande Chaloupe	Route Corniche	January, 2010	sorghum	Sorghum verticilliflorum	Ms15	CIR53#2206015	22-6_15
Run18	Reunion	Grande Chaloupe	Route Corniche	January, 2010	sorghum	Sorghum verticilliflorum	Ms15	CIR53#2206016	22-6_16
Run18	Reunion	Grande Chaloupe	Route Corniche	January, 2010	sorghum	Sorghum verticilliflorum	Ms15	CIR53#2206017	22-6_17
Run18	Reunion	Grande Chaloupe	Route Corniche	January, 2010	sorghum	Sorghum verticilliflorum	Ms15	CIR53#2206018	22-6_18
Run18	Reunion	Grande Chaloupe	Route Corniche	January, 2010	sorghum	Sorghum verticilliflorum	Ms15	CIR53#2206019	22-6_19
Run18	Reunion	Grande Chaloupe	Route Corniche	January, 2010	sorghum	Sorghum verticilliflorum	Ms15	CIR53#2206020	22-6_20
Run18	Reunion	Grande Chaloupe	Route Corniche	January, 2010	sorghum	Sorghum verticilliflorum	Ms15	CIR53#2206021	22-6_21
Run18	Reunion	Grande Chaloupe	Route Corniche	January, 2010	sorghum	Sorghum verticilliflorum	Ms15	CIR53#2206022	22-6_22
Run18	Reunion	Grande Chaloupe	Route Corniche	January, 2010	sorghum	Sorghum verticilliflorum	Ms15	CIR53#2206023	22-6_23
Run18	Reunion	Grande Chaloupe	Route Corniche	January, 2010	sorghum	Sorghum verticilliflorum	Ms15	CIR53#2206024	22-6_24
Run18	Reunion	Grande Chaloupe	Route Corniche	January, 2010	sorghum	Sorghum verticilliflorum	Ms15	CIR53#2206025	22-6_25
Run18	Reunion	Grande Chaloupe	Route Corniche	January, 2010	sorghum	Sorghum verticilliflorum	Ms15	CIR53#2206026	22-6_26
Run18	Reunion	Grande Chaloupe	Route Corniche	January, 2010	sorghum	Sorghum verticilliflorum	Ms15	CIR53#2206027	22-6_27
Run18	Reunion	Grande Chaloupe	Route Corniche	January, 2010	sorghum	Sorghum verticilliflorum	Ms15	CIR53#2206028	22-6_28
Run18	Reunion	Grande Chaloupe	Route Corniche	January, 2010	sorghum	Sorghum verticilliflorum	Ms15	CIR53#2206029	22-6_29
Run18	Reunion	Grande Chaloupe	Route Corniche	January, 2010	sorghum	Sorghum verticilliflorum	Ms15	CIR53#2206030	22-6_30
Run18	Reunion	Grande Chaloupe	Route Corniche	January, 2010	sorghum	Sorghum verticilliflorum	Ms15	CIR53#2206031	22-6_31
Run18	Reunion	Grande Chaloupe	Route Corniche	January, 2010	sorghum	Sorghum verticilliflorum	Ms15	CIR53#2206032	22-6_32
Run19	Reunion	Saint Pierre	Bassin Martin experimental station	February, 2010	sugarcane	Saccharum sp.	Ms16	CIR53#2213001	22-13_1
Run19	Reunion	Saint Pierre	Bassin Martin experimental station	February, 2010	sugarcane	Saccharum sp.	Ms16	CIR53#2213002	22-13_2
Run19	Reunion	Saint Pierre	Bassin Martin experimental station	February, 2010	sugarcane	Saccharum sp.	Ms16	CIR53#2213003	22-13_3
Run19	Reunion	Saint Pierre	Bassin Martin experimental station	February, 2010	sugarcane	Saccharum sp.	Ms11	CIR53#2213004	22-13_4
Run19	Reunion	Saint Pierre	Bassin Martin experimental station	February, 2010	sugarcane	Saccharum sp.	Ms11	CIR53#2213005	22-13_5
Run19	Reunion	Saint Pierre	Bassin Martin experimental station	February, 2010	sugarcane	Saccharum sp.	Ms11	CIR53#2213006	22-13_6
Run19	Reunion	Saint Pierre	Bassin Martin experimental station	February, 2010	sugarcane	Saccharum sp.	Ms11	CIR53#2213007	22-13_7
Run19	Reunion	Saint Pierre	Bassin Martin experimental station	February, 2010	sugarcane	Saccharum sp.	Ms16	CIR53#2213008	22-13_8
Run19	Reunion	Saint Pierre	Bassin Martin experimental station	February, 2010	sugarcane	Saccharum sp.	Ms16	CIR53#2213009	22-13_9
Run19	Reunion	Saint Pierre	Bassin Martin experimental station	February, 2010	sugarcane	Saccharum sp.	Ms16	CIR53#2213010	22-13_10	MSW028-13	KJ083188
Run19	Reunion	Saint Pierre	Bassin Martin experimental station	February, 2010	sugarcane	Saccharum sp.	Ms16	CIR53#2213011	22-13_11
Run19	Reunion	Saint Pierre	Bassin Martin experimental station	February, 2010	sugarcane	Saccharum sp.	Ms15	CIR53#2213012	22-13_12
Run19	Reunion	Saint Pierre	Bassin Martin experimental station	February, 2010	sugarcane	Saccharum sp.	Ms16	CIR53#2213013	22-13_13
Run19	Reunion	Saint Pierre	Bassin Martin experimental station	February, 2010	sugarcane	Saccharum sp.	Ms11	CIR53#2213014	22-13_14
Run19	Reunion	Saint Pierre	Bassin Martin experimental station	February, 2010	sugarcane	Saccharum sp.	Ms16	CIR53#2213015	22-13_15
Run19	Reunion	Saint Pierre	Bassin Martin experimental station	February, 2010	sugarcane	Saccharum sp.	Ms15	CIR53#2213016	22-13_16
Run19	Reunion	Saint Pierre	Bassin Martin experimental station	February, 2010	sugarcane	Saccharum sp.	Ms16	CIR53#2213017	22-13_17
Run19	Reunion	Saint Pierre	Bassin Martin experimental station	February, 2010	sugarcane	Saccharum sp.	Ms16	CIR53#2213018	22-13_18
Run19	Reunion	Saint Pierre	Bassin Martin experimental station	February, 2010	sugarcane	Saccharum sp.	Ms11	CIR53#2213019	22-13_19
Run19	Reunion	Saint Pierre	Bassin Martin experimental station	February, 2010	sugarcane	Saccharum sp.	Ms11	CIR53#2213020	22-13_20
Run19	Reunion	Saint Pierre	Bassin Martin experimental station	February, 2010	sugarcane	Saccharum sp.	Ms16	CIR53#2213021	22-13_21
Run19	Reunion	Saint Pierre	Bassin Martin experimental station	February, 2010	sugarcane	Saccharum sp.	Ms16	CIR53#2213022	22-13_22
Run19	Reunion	Saint Pierre	Bassin Martin experimental station	February, 2010	sugarcane	Saccharum sp.	Ms11	CIR53#2213023	22-13_23
Run19	Reunion	Saint Pierre	Bassin Martin experimental station	February, 2010	sugarcane	Saccharum sp.	Ms16	CIR53#2213024	22-13_24
Run19	Reunion	Saint Pierre	Bassin Martin experimental station	February, 2010	sugarcane	Saccharum sp.	Ms16	CIR53#2213025	22-13_25
Run19	Reunion	Saint Pierre	Bassin Martin experimental station	February, 2010	sugarcane	Saccharum sp.	Ms16	CIR53#2213026	22-13_26
Run19	Reunion	Saint Pierre	Bassin Martin experimental station	February, 2010	sugarcane	Saccharum sp.	Ms16	CIR53#2213027	22-13_27
Run19	Reunion	Saint Pierre	Bassin Martin experimental station	February, 2010	sugarcane	Saccharum sp.	Ms11	CIR53#2213028	22-13_28
Run19	Reunion	Saint Pierre	Bassin Martin experimental station	February, 2010	sugarcane	Saccharum sp.	Ms11	CIR53#2213029	22-13_29
Run19	Reunion	Saint Pierre	Bassin Martin experimental station	February, 2010	sugarcane	Saccharum sp.	Ms11	CIR53#2213030	22-13_30
Run19	Reunion	Saint Pierre	Bassin Martin experimental station	February, 2010	sugarcane	Saccharum sp.	Ms16	CIR53#2213031	22-13_31
Run19	Reunion	Saint Pierre	Bassin Martin experimental station	February, 2010	sugarcane	Saccharum sp.	Ms16	CIR53#2213032	22-13_32
Run20	Reunion	Savanna	ISB	January, 2010	sorghum	Sorghum verticilliflorum	Ms13	CIR53#2214001	22-14_1	MSW029-13	KJ083187
Run20	Reunion	Savanna	ISB	January, 2010	sorghum	Sorghum verticilliflorum	Ms13	CIR53#2214002	22-14_2
Run20	Reunion	Savanna	ISB	January, 2010	sorghum	Sorghum verticilliflorum	Ms13	CIR53#2214003	22-14_3
Run20	Reunion	Savanna	ISB	January, 2010	sorghum	Sorghum verticilliflorum	Ms13	CIR53#2214004	22-14_4
Run20	Reunion	Savanna	ISB	January, 2010	sorghum	Sorghum verticilliflorum	Ms13	CIR53#2214005	22-14_5
Run20	Reunion	Savanna	ISB	January, 2010	sorghum	Sorghum verticilliflorum	Ms15	CIR53#2214006	22-14_6
Run20	Reunion	Savanna	ISB	January, 2010	sorghum	Sorghum verticilliflorum	Ms13	CIR53#2214007	22-14_7
Run20	Reunion	Savanna	ISB	January, 2010	sorghum	Sorghum verticilliflorum	Ms15	CIR53#2214008	22-14_8
Run20	Reunion	Savanna	ISB	January, 2010	sorghum	Sorghum verticilliflorum	Ms15	CIR53#2214009	22-14_9
Run20	Reunion	Savanna	ISB	January, 2010	sorghum	Sorghum verticilliflorum	Ms15	CIR53#2214010	22-14_10
Run20	Reunion	Savanna	ISB	January, 2010	sorghum	Sorghum verticilliflorum	Ms15	CIR53#2214011	22-14_11
Run20	Reunion	Savanna	ISB	January, 2010	sorghum	Sorghum verticilliflorum	Ms13	CIR53#2214012	22-14_12
Run20	Reunion	Savanna	ISB	January, 2010	sorghum	Sorghum verticilliflorum	Ms15	CIR53#2214015	22-14_15
Run20	Reunion	Savanna	ISB	January, 2010	sorghum	Sorghum verticilliflorum	Ms13	CIR53#2214016	22-14_16
Run20	Reunion	Savanna	ISB	January, 2010	sorghum	Sorghum verticilliflorum	Ms15	CIR53#2214017	22-14_17
Run20	Reunion	Savanna	ISB	January, 2010	sorghum	Sorghum verticilliflorum	Ms13	CIR53#2214018	22-14_18
Run20	Reunion	Savanna	ISB	January, 2010	sorghum	Sorghum verticilliflorum	Ms13	CIR53#2214019	22-14_19
Run20	Reunion	Savanna	ISB	January, 2010	sorghum	Sorghum verticilliflorum	Ms15	CIR53#2214020	22-14_20
Run20	Reunion	Savanna	ISB	January, 2010	sorghum	Sorghum verticilliflorum	Ms15	CIR53#2214021	22-14_21
Run20	Reunion	Savanna	ISB	January, 2010	sorghum	Sorghum verticilliflorum	Ms15	CIR53#2214022	22-14_22
Run20	Reunion	Savanna	ISB	January, 2010	sorghum	Sorghum verticilliflorum	Ms13	CIR53#2214023	22-14_23
Run20	Reunion	Savanna	ISB	January, 2010	sorghum	Sorghum verticilliflorum	Ms13	CIR53#2214024	22-14_24
Run20	Reunion	Savanna	ISB	January, 2010	sorghum	Sorghum verticilliflorum	Ms13	CIR53#2214025	22-14_25
Run20	Reunion	Savanna	ISB	January, 2010	sorghum	Sorghum verticilliflorum	Ms13	CIR53#2214026	22-14_26
Run20	Reunion	Savanna	ISB	January, 2010	sorghum	Sorghum verticilliflorum	Ms13	CIR53#2214027	22-14_27
Run20	Reunion	Savanna	ISB	January, 2010	sorghum	Sorghum verticilliflorum	Ms13	CIR53#2214028	22-14_28
Run20	Reunion	Savanna	ISB	January, 2010	sorghum	Sorghum verticilliflorum	Ms13	CIR53#2214030	22-14_30
Run20	Reunion	Savanna	ISB	January, 2010	sorghum	Sorghum verticilliflorum	Ms15	CIR53#2214031	22-14_31
Run20	Reunion	Savanna	ISB	January, 2010	sorghum	Sorghum verticilliflorum	Ms13	CIR53#2214032	22-14_32
Run21	Reunion	Saint André	parc colosse	January, 2010	sorghum	Sorghum verticilliflorum	Ms15	CIR53#2229001	22-29_1
Run21	Reunion	Saint André	parc colosse	January, 2010	sorghum	Sorghum verticilliflorum	Ms15	CIR53#2229002	22-29_2
Run21	Reunion	Saint André	parc colosse	January, 2010	sorghum	Sorghum verticilliflorum	Ms15	CIR53#2229003	22-29_3
Run21	Reunion	Saint André	parc colosse	January, 2010	sorghum	Sorghum verticilliflorum	Ms15	CIR53#2229004	22-29_4
Run21	Reunion	Saint André	parc colosse	January, 2010	sorghum	Sorghum verticilliflorum	Ms15	CIR53#2229005	22-29_5
Run21	Reunion	Saint André	parc colosse	January, 2010	sorghum	Sorghum verticilliflorum	Ms15	CIR53#2229009	22-29_9
Run21	Reunion	Saint André	parc colosse	January, 2010	sorghum	Sorghum verticilliflorum	Ms15	CIR53#2229010	22-29_10
Run21	Reunion	Saint André	parc colosse	January, 2010	sorghum	Sorghum verticilliflorum	Ms15	CIR53#2229012	22-29_12
Run21	Reunion	Saint André	parc colosse	January, 2010	sorghum	Sorghum verticilliflorum	Ms15	CIR53#2229013	22-29_13
Run21	Reunion	Saint André	parc colosse	January, 2010	sorghum	Sorghum verticilliflorum	Ms15	CIR53#2229014	22-29_14
Run21	Reunion	Saint André	parc colosse	January, 2010	sorghum	Sorghum verticilliflorum	Ms16	CIR53#2229015	22-29_15
Run21	Reunion	Saint André	parc colosse	January, 2010	sorghum	Sorghum verticilliflorum	Ms15	CIR53#2229016	22-29_16
Run21	Reunion	Saint André	parc colosse	January, 2010	sorghum	Sorghum verticilliflorum	Ms15	CIR53#2229018	22-29_18
Run21	Reunion	Saint André	parc colosse	January, 2010	sorghum	Sorghum verticilliflorum	Ms15	CIR53#2229019	22-29_19
Run21	Reunion	Saint André	parc colosse	January, 2010	sorghum	Sorghum verticilliflorum	Ms15	CIR53#2229020	22-29_20
Run21	Reunion	Saint André	parc colosse	January, 2010	sorghum	Sorghum verticilliflorum	Ms15	CIR53#2229023	22-29_23
Run21	Reunion	Saint André	parc colosse	January, 2010	sorghum	Sorghum verticilliflorum	Ms15	CIR53#2229024	22-29_24
Run21	Reunion	Saint André	parc colosse	January, 2010	sorghum	Sorghum verticilliflorum	Ms15	CIR53#2229025	22-29_25
Run21	Reunion	Saint André	parc colosse	January, 2010	sorghum	Sorghum verticilliflorum	Ms15	CIR53#2229026	22-29_26
Run21	Reunion	Saint André	parc colosse	January, 2010	sorghum	Sorghum verticilliflorum	Ms15	CIR53#2229027	22-29_27
Run21	Reunion	Saint André	parc colosse	January, 2010	sorghum	Sorghum verticilliflorum	Ms15	CIR53#2229028	22-29_28
Run21	Reunion	Saint André	parc colosse	January, 2010	sorghum	Sorghum verticilliflorum	Ms16	CIR53#2229029	22-29_29
Run21	Reunion	Saint André	parc colosse	January, 2010	sorghum	Sorghum verticilliflorum	Ms15	CIR53#2229030	22-29_30
Run21	Reunion	Saint André	parc colosse	January, 2010	sorghum	Sorghum verticilliflorum	Ms15	CIR53#2229031	22-29_31
Run21	Reunion	Saint André	parc colosse	January, 2010	sorghum	Sorghum verticilliflorum	Ms15	CIR53#2229032	22-29_32
Run22	Reunion	Piton Sainte Rose		February, 2010	sorghum	Sorghum verticilliflorum	Ms15	CIR53#5801001	58-1_1
Run22	Reunion	Piton Sainte Rose		February, 2010	sorghum	Sorghum verticilliflorum	Ms15	CIR53#5801002	58-1_2
Run22	Reunion	Piton Sainte Rose		February, 2010	sorghum	Sorghum verticilliflorum	Ms15	CIR53#5801003	58-1_3
Run22	Reunion	Piton Sainte Rose		February, 2010	sorghum	Sorghum verticilliflorum	Ms15	CIR53#5801004	58-1_4
Run22	Reunion	Piton Sainte Rose		February, 2010	sorghum	Sorghum verticilliflorum	Ms15	CIR53#5801005	58-1_5
Run22	Reunion	Piton Sainte Rose		February, 2010	sorghum	Sorghum verticilliflorum	Ms15	CIR53#5801006	58-1_6
Run22	Reunion	Piton Sainte Rose		February, 2010	sorghum	Sorghum verticilliflorum	Ms15	CIR53#5801007	58-1_7
Run22	Reunion	Piton Sainte Rose		February, 2010	sorghum	Sorghum verticilliflorum	Ms15	CIR53#5801008	58-1_8
Run22	Reunion	Piton Sainte Rose		February, 2010	sorghum	Sorghum verticilliflorum	Ms15	CIR53#5801009	58-1_9
Run22	Reunion	Piton Sainte Rose		February, 2010	sorghum	Sorghum verticilliflorum	Ms15	CIR53#5801010	58-1_10
Run22	Reunion	Piton Sainte Rose		February, 2010	sorghum	Sorghum verticilliflorum	Ms15	CIR53#5801011	58-1_11
Run22	Reunion	Piton Sainte Rose		February, 2010	sorghum	Sorghum verticilliflorum	Ms15	CIR53#5801012	58-1_12
Run22	Reunion	Piton Sainte Rose		February, 2010	sorghum	Sorghum verticilliflorum	Ms15	CIR53#5801013	58-1_13
Run22	Reunion	Piton Sainte Rose		February, 2010	sorghum	Sorghum verticilliflorum	Ms15	CIR53#5801015	58-1_15
Run22	Reunion	Piton Sainte Rose		February, 2010	sorghum	Sorghum verticilliflorum	Ms15	CIR53#5801016	58-1_16
Run22	Reunion	Piton Sainte Rose		February, 2010	sorghum	Sorghum verticilliflorum	Ms15	CIR53#5801017	58-1_17
Run22	Reunion	Piton Sainte Rose		February, 2010	sorghum	Sorghum verticilliflorum	Ms15	CIR53#5801018	58-1_18
Run22	Reunion	Piton Sainte Rose		February, 2010	sorghum	Sorghum verticilliflorum	Ms15	CIR53#5801019	58-1_19
Run22	Reunion	Piton Sainte Rose		February, 2010	sorghum	Sorghum verticilliflorum	Ms15	CIR53#5801020	58-1_20
Run22	Reunion	Piton Sainte Rose		February, 2010	sorghum	Sorghum verticilliflorum	Ms15	CIR53#5801021	58-1_21
Run22	Reunion	Piton Sainte Rose		February, 2010	sorghum	Sorghum verticilliflorum	Ms15	CIR53#5801022	58-1_22
Run22	Reunion	Piton Sainte Rose		February, 2010	sorghum	Sorghum verticilliflorum	Ms15	CIR53#5801023	58-1_23
Run22	Reunion	Piton Sainte Rose		February, 2010	sorghum	Sorghum verticilliflorum	Ms15	CIR53#5801024	58-1_24
Run22	Reunion	Piton Sainte Rose		February, 2010	sorghum	Sorghum verticilliflorum	Ms15	CIR53#5801025	58-1_25
Run22	Reunion	Piton Sainte Rose		February, 2010	sorghum	Sorghum verticilliflorum	Ms15	CIR53#5801026	58-1_26
Run22	Reunion	Piton Sainte Rose		February, 2010	sorghum	Sorghum verticilliflorum	Ms15	CIR53#5801027	58-1_27
Run22	Reunion	Piton Sainte Rose		February, 2010	sorghum	Sorghum verticilliflorum	Ms15	CIR53#5801028	58-1_28
Run22	Reunion	Piton Sainte Rose		February, 2010	sorghum	Sorghum verticilliflorum	Ms15	CIR53#5801029	58-1_29
Run22	Reunion	Piton Sainte Rose		February, 2010	sorghum	Sorghum verticilliflorum	Ms15	CIR53#5801030	58-1_30
Run22	Reunion	Piton Sainte Rose		February, 2010	sorghum	Sorghum verticilliflorum	Ms15	CIR53#5801031	58-1_31
Run22	Reunion	Piton Sainte Rose		February, 2010	sorghum	Sorghum verticilliflorum	Ms15	CIR53#5801032	58-1_32
Run23	Reunion	Saint Gilles les Hauts	Antenne 4	February, 2010	sorghum	Sorghum verticilliflorum	Ms15	CIR53#5803002	58-3_2
Run23	Reunion	Saint Gilles les Hauts	Antenne 4	February, 2010	sorghum	Sorghum verticilliflorum	Ms12	CIR53#5803003	58-3_3
Run23	Reunion	Saint Gilles les Hauts	Antenne 4	February, 2010	sorghum	Sorghum verticilliflorum	Ms16	CIR53#5803004	58-3_4
Run23	Reunion	Saint Gilles les Hauts	Antenne 4	February, 2010	sorghum	Sorghum verticilliflorum	Ms16	CIR53#5803005	58-3_5
Run23	Reunion	Saint Gilles les Hauts	Antenne 4	February, 2010	sorghum	Sorghum verticilliflorum	Ms16	CIR53#5803006	58-3_6
Run23	Reunion	Saint Gilles les Hauts	Antenne 4	February, 2010	sorghum	Sorghum verticilliflorum	Ms15	CIR53#5803007	58-3_7
Run23	Reunion	Saint Gilles les Hauts	Antenne 4	February, 2010	sorghum	Sorghum verticilliflorum	Ms16	CIR53#5803008	58-3_8
Run23	Reunion	Saint Gilles les Hauts	Antenne 4	February, 2010	sorghum	Sorghum verticilliflorum	Ms16	CIR53#5803009	58-3_9
Run23	Reunion	Saint Gilles les Hauts	Antenne 4	February, 2010	sorghum	Sorghum verticilliflorum	Ms12	CIR53#5803010	58-3_10	MSW092-13	KJ083124
Run23	Reunion	Saint Gilles les Hauts	Antenne 4	February, 2010	sorghum	Sorghum verticilliflorum	Ms15	CIR53#5803011	58-3_11
Run23	Reunion	Saint Gilles les Hauts	Antenne 4	February, 2010	sorghum	Sorghum verticilliflorum	Ms15	CIR53#5803012	58-3_12
Run23	Reunion	Saint Gilles les Hauts	Antenne 4	February, 2010	sorghum	Sorghum verticilliflorum	Ms15	CIR53#5803014	58-3_14
Run23	Reunion	Saint Gilles les Hauts	Antenne 4	February, 2010	sorghum	Sorghum verticilliflorum	Ms16	CIR53#5803015	58-3_15
Run23	Reunion	Saint Gilles les Hauts	Antenne 4	February, 2010	sorghum	Sorghum verticilliflorum	Ms15	CIR53#5803016	58-3_16
Run23	Reunion	Saint Gilles les Hauts	Antenne 4	February, 2010	sorghum	Sorghum verticilliflorum	Ms16	CIR53#5803017	58-3_17
Run23	Reunion	Saint Gilles les Hauts	Antenne 4	February, 2010	sorghum	Sorghum verticilliflorum	Ms12	CIR53#5803018	58-3_18
Run23	Reunion	Saint Gilles les Hauts	Antenne 4	February, 2010	sorghum	Sorghum verticilliflorum	Ms16	CIR53#5803019	58-3_19
Run23	Reunion	Saint Gilles les Hauts	Antenne 4	February, 2010	sorghum	Sorghum verticilliflorum	Ms16	CIR53#5803020	58-3_20
Run23	Reunion	Saint Gilles les Hauts	Antenne 4	February, 2010	sorghum	Sorghum verticilliflorum	Ms16	CIR53#5803021	58-3_21
Run23	Reunion	Saint Gilles les Hauts	Antenne 4	February, 2010	sorghum	Sorghum verticilliflorum	Ms15	CIR53#5803022	58-3_22
Run23	Reunion	Saint Gilles les Hauts	Antenne 4	February, 2010	sorghum	Sorghum verticilliflorum	Ms15	CIR53#5803023	58-3_23
Run23	Reunion	Saint Gilles les Hauts	Antenne 4	February, 2010	sorghum	Sorghum verticilliflorum	Ms15	CIR53#5803024	58-3_24
Run23	Reunion	Saint Gilles les Hauts	Antenne 4	February, 2010	sorghum	Sorghum verticilliflorum	Ms15	CIR53#5803025	58-3_25
Run23	Reunion	Saint Gilles les Hauts	Antenne 4	February, 2010	sorghum	Sorghum verticilliflorum	Ms15	CIR53#5803026	58-3_26
Run23	Reunion	Saint Gilles les Hauts	Antenne 4	February, 2010	sorghum	Sorghum verticilliflorum	Ms16	CIR53#5803027	58-3_27
Run23	Reunion	Saint Gilles les Hauts	Antenne 4	February, 2010	sorghum	Sorghum verticilliflorum	Ms15	CIR53#5803028	58-3_28
Run23	Reunion	Saint Gilles les Hauts	Antenne 4	February, 2010	sorghum	Sorghum verticilliflorum	Ms15	CIR53#5803029	58-3_29
Run23	Reunion	Saint Gilles les Hauts	Antenne 4	February, 2010	sorghum	Sorghum verticilliflorum	Ms12	CIR53#5803031	58-3_31
Run23	Reunion	Saint Gilles les Hauts	Antenne 4	February, 2010	sorghum	Sorghum verticilliflorum	Ms15	CIR53#5803032	58-3_32
Run24	Reunion	Sainte Anne	national road	February, 2010	sorghum	Sorghum verticilliflorum	Ms16	CIR53#5804001	58-4_1
Run24	Reunion	Sainte Anne	national road	February, 2010	sorghum	Sorghum verticilliflorum	Ms16	CIR53#5804002	58-4_2
Run24	Reunion	Sainte Anne	national road	February, 2010	sorghum	Sorghum verticilliflorum	Ms16	CIR53#5804003	58-4_3
Run24	Reunion	Sainte Anne	national road	February, 2010	sorghum	Sorghum verticilliflorum	Ms16	CIR53#5804004	58-4_4
Run24	Reunion	Sainte Anne	national road	February, 2010	sorghum	Sorghum verticilliflorum	Ms15	CIR53#5804006	58-4_6
Run24	Reunion	Sainte Anne	national road	February, 2010	sorghum	Sorghum verticilliflorum	Ms15	CIR53#5804007	58-4_7
Run24	Reunion	Sainte Anne	national road	February, 2010	sorghum	Sorghum verticilliflorum	Ms16	CIR53#5804008	58-4_8
Run24	Reunion	Sainte Anne	national road	February, 2010	sorghum	Sorghum verticilliflorum	Ms16	CIR53#5804009	58-4_9
Run24	Reunion	Sainte Anne	national road	February, 2010	sorghum	Sorghum verticilliflorum	Ms16	CIR53#5804011	58-4_11
Run24	Reunion	Sainte Anne	national road	February, 2010	sorghum	Sorghum verticilliflorum	Ms15	CIR53#5804012	58-4_12
Run24	Reunion	Sainte Anne	national road	February, 2010	sorghum	Sorghum verticilliflorum	Ms15	CIR53#5804015	58-4_15
Run24	Reunion	Sainte Anne	national road	February, 2010	sorghum	Sorghum verticilliflorum	Ms16	CIR53#5804016	58-4_16
Run24	Reunion	Sainte Anne	national road	February, 2010	sorghum	Sorghum verticilliflorum	Ms16	CIR53#5804017	58-4_17
Run24	Reunion	Sainte Anne	national road	February, 2010	sorghum	Sorghum verticilliflorum	Ms15	CIR53#5804018	58-4_18
Run24	Reunion	Sainte Anne	national road	February, 2010	sorghum	Sorghum verticilliflorum	Ms15	CIR53#5804019	58-4_19
Run24	Reunion	Sainte Anne	national road	February, 2010	sorghum	Sorghum verticilliflorum	Ms16	CIR53#5804020	58-4_20
Run24	Reunion	Sainte Anne	national road	February, 2010	sorghum	Sorghum verticilliflorum	Ms16	CIR53#5804021	58-4_21
Run24	Reunion	Sainte Anne	national road	February, 2010	sorghum	Sorghum verticilliflorum	Ms16	CIR53#5804023	58-4_23
Run24	Reunion	Sainte Anne	national road	February, 2010	sorghum	Sorghum verticilliflorum	Ms16	CIR53#5804024	58-4_24
Run24	Reunion	Sainte Anne	national road	February, 2010	sorghum	Sorghum verticilliflorum	Ms16	CIR53#5804025	58-4_25
Run24	Reunion	Sainte Anne	national road	February, 2010	sorghum	Sorghum verticilliflorum	Ms15	CIR53#5804026	58-4_26
Run24	Reunion	Sainte Anne	national road	February, 2010	sorghum	Sorghum verticilliflorum	Ms16	CIR53#5804027	58-4_27
Run24	Reunion	Sainte Anne	national road	February, 2010	sorghum	Sorghum verticilliflorum	Ms14	CIR53#5804028	58-4_28	MSW093-13	KJ083123
Run24	Reunion	Sainte Anne	national road	February, 2010	sorghum	Sorghum verticilliflorum	Ms16	CIR53#5804030	58-4_30
Run24	Reunion	Sainte Anne	national road	February, 2010	sorghum	Sorghum verticilliflorum	Ms15	CIR53#5804032	58-4_32
Run25	Reunion	Saint Pierre	Bassin Martin experimental station	February, 2010	sorghum	Sorghum verticilliflorum	Ms15	CIR53#5807001	58-7_1
Run25	Reunion	Saint Pierre	Bassin Martin experimental station	February, 2010	sorghum	Sorghum verticilliflorum	Ms15	CIR53#5807002	58-7_2
Run25	Reunion	Saint Pierre	Bassin Martin experimental station	February, 2010	sorghum	Sorghum verticilliflorum	Ms16	CIR53#5807003	58-7_3
Run25	Reunion	Saint Pierre	Bassin Martin experimental station	February, 2010	sorghum	Sorghum verticilliflorum	Ms15	CIR53#5807004	58-7_4
Run25	Reunion	Saint Pierre	Bassin Martin experimental station	February, 2010	sorghum	Sorghum verticilliflorum	Ms15	CIR53#5807005	58-7_5
Run25	Reunion	Saint Pierre	Bassin Martin experimental station	February, 2010	sorghum	Sorghum verticilliflorum	Ms15	CIR53#5807006	58-7_6
Run25	Reunion	Saint Pierre	Bassin Martin experimental station	February, 2010	sorghum	Sorghum verticilliflorum	Ms16	CIR53#5807007	58-7_7
Run25	Reunion	Saint Pierre	Bassin Martin experimental station	February, 2010	sorghum	Sorghum verticilliflorum	Ms15	CIR53#5807008	58-7_8
Run25	Reunion	Saint Pierre	Bassin Martin experimental station	February, 2010	sorghum	Sorghum verticilliflorum	Ms15	CIR53#5807009	58-7_9
Run25	Reunion	Saint Pierre	Bassin Martin experimental station	February, 2010	sorghum	Sorghum verticilliflorum	Ms15	CIR53#5807010	58-7_10
Run25	Reunion	Saint Pierre	Bassin Martin experimental station	February, 2010	sorghum	Sorghum verticilliflorum	Ms15	CIR53#5807011	58-7_11
Run25	Reunion	Saint Pierre	Bassin Martin experimental station	February, 2010	sorghum	Sorghum verticilliflorum	Ms15	CIR53#5807012	58-7_12
Run25	Reunion	Saint Pierre	Bassin Martin experimental station	February, 2010	sorghum	Sorghum verticilliflorum	Ms15	CIR53#5807013	58-7_13
Run25	Reunion	Saint Pierre	Bassin Martin experimental station	February, 2010	sorghum	Sorghum verticilliflorum	Ms16	CIR53#5807014	58-7_14
Run25	Reunion	Saint Pierre	Bassin Martin experimental station	February, 2010	sorghum	Sorghum verticilliflorum	Ms15	CIR53#5807015	58-7_15
Run25	Reunion	Saint Pierre	Bassin Martin experimental station	February, 2010	sorghum	Sorghum verticilliflorum	Ms16	CIR53#5807016	58-7_16
Run25	Reunion	Saint Pierre	Bassin Martin experimental station	February, 2010	sorghum	Sorghum verticilliflorum	Ms15	CIR53#5807017	58-7_17
Run25	Reunion	Saint Pierre	Bassin Martin experimental station	February, 2010	sorghum	Sorghum verticilliflorum	Ms15	CIR53#5807018	58-7_18
Run25	Reunion	Saint Pierre	Bassin Martin experimental station	February, 2010	sorghum	Sorghum verticilliflorum	Ms16	CIR53#5807019	58-7_19
Run25	Reunion	Saint Pierre	Bassin Martin experimental station	February, 2010	sorghum	Sorghum verticilliflorum	Ms15	CIR53#5807020	58-7_20
Run25	Reunion	Saint Pierre	Bassin Martin experimental station	February, 2010	sorghum	Sorghum verticilliflorum	Ms15	CIR53#5807021	58-7_21
Run25	Reunion	Saint Pierre	Bassin Martin experimental station	February, 2010	sorghum	Sorghum verticilliflorum	Ms15	CIR53#5807022	58-7_22
Run25	Reunion	Saint Pierre	Bassin Martin experimental station	February, 2010	sorghum	Sorghum verticilliflorum	Ms15	CIR53#5807023	58-7_23
Run25	Reunion	Saint Pierre	Bassin Martin experimental station	February, 2010	sorghum	Sorghum verticilliflorum	Ms15	CIR53#5807024	58-7_24
Run25	Reunion	Saint Pierre	Bassin Martin experimental station	February, 2010	sorghum	Sorghum verticilliflorum	Ms15	CIR53#5807025	58-7_25
Run25	Reunion	Saint Pierre	Bassin Martin experimental station	February, 2010	sorghum	Sorghum verticilliflorum	Ms16	CIR53#5807026	58-7_26
Run25	Reunion	Saint Pierre	Bassin Martin experimental station	February, 2010	sorghum	Sorghum verticilliflorum	Ms15	CIR53#5807027	58-7_27
Run25	Reunion	Saint Pierre	Bassin Martin experimental station	February, 2010	sorghum	Sorghum verticilliflorum	Ms15	CIR53#5807028	58-7_28
Run25	Reunion	Saint Pierre	Bassin Martin experimental station	February, 2010	sorghum	Sorghum verticilliflorum	Ms16	CIR53#5807029	58-7_29
Run25	Reunion	Saint Pierre	Bassin Martin experimental station	February, 2010	sorghum	Sorghum verticilliflorum	Ms16	CIR53#5807030	58-7_30
Run25	Reunion	Saint Pierre	Bassin Martin experimental station	February, 2010	sorghum	Sorghum verticilliflorum	Ms15	CIR53#5807031	58-7_31
Run25	Reunion	Saint Pierre	Bassin Martin experimental station	February, 2010	sorghum	Sorghum verticilliflorum	Ms15	CIR53#5807032	58-7_32
Run26	Reunion	Petite Île		March, 2010	sorghum	Sorghum verticilliflorum	Ms15	CIR53#5809001	58-9_1
Run26	Reunion	Petite Île		March, 2010	sorghum	Sorghum verticilliflorum	Ms16	CIR53#5809002	58-9_2
Run26	Reunion	Petite Île		March, 2010	sorghum	Sorghum verticilliflorum	Ms16	CIR53#5809003	58-9_3
Run26	Reunion	Petite Île		March, 2010	sorghum	Sorghum verticilliflorum	Ms15	CIR53#5809004	58-9_4
Run26	Reunion	Petite Île		March, 2010	sorghum	Sorghum verticilliflorum	Ms16	CIR53#5809005	58-9_5
Run26	Reunion	Petite Île		March, 2010	sorghum	Sorghum verticilliflorum	Ms16	CIR53#5809006	58-9_6
Run26	Reunion	Petite Île		March, 2010	sorghum	Sorghum verticilliflorum	Ms16	CIR53#5809007	58-9_7
Run26	Reunion	Petite Île		March, 2010	sorghum	Sorghum verticilliflorum	Ms15	CIR53#5809008	58-9_8
Run26	Reunion	Petite Île		March, 2010	sorghum	Sorghum verticilliflorum	Ms16	CIR53#5809009	58-9_9
Run26	Reunion	Petite Île		March, 2010	sorghum	Sorghum verticilliflorum	Ms15	CIR53#5809010	58-9_10
Run26	Reunion	Petite Île		March, 2010	sorghum	Sorghum verticilliflorum	Ms15	CIR53#5809011	58-9_11
Run26	Reunion	Petite Île		March, 2010	sorghum	Sorghum verticilliflorum	Ms16	CIR53#5809012	58-9_12
Run26	Reunion	Petite Île		March, 2010	sorghum	Sorghum verticilliflorum	Ms16	CIR53#5809013	58-9_13
Run26	Reunion	Petite Île		March, 2010	sorghum	Sorghum verticilliflorum	Ms16	CIR53#5809015	58-9_15
Run26	Reunion	Petite Île		March, 2010	sorghum	Sorghum verticilliflorum	Ms11	CIR53#5809016	58-9_16
Run26	Reunion	Petite Île		March, 2010	sorghum	Sorghum verticilliflorum	Ms16	CIR53#5809017	58-9_17
Run26	Reunion	Petite Île		March, 2010	sorghum	Sorghum verticilliflorum	Ms16	CIR53#5809018	58-9_18
Run26	Reunion	Petite Île		March, 2010	sorghum	Sorghum verticilliflorum	Ms16	CIR53#5809019	58-9_19
Run26	Reunion	Petite Île		March, 2010	sorghum	Sorghum verticilliflorum	Ms15	CIR53#5809020	58-9_20
Run26	Reunion	Petite Île		March, 2010	sorghum	Sorghum verticilliflorum	Ms16	CIR53#5809021	58-9_21
Run26	Reunion	Petite Île		March, 2010	sorghum	Sorghum verticilliflorum	Ms16	CIR53#5809022	58-9_22
Run26	Reunion	Petite Île		March, 2010	sorghum	Sorghum verticilliflorum	Ms15	CIR53#5809023	58-9_23
Run26	Reunion	Petite Île		March, 2010	sorghum	Sorghum verticilliflorum	Ms15	CIR53#5809024	58-9_24
Run26	Reunion	Petite Île		March, 2010	sorghum	Sorghum verticilliflorum	Ms15	CIR53#5809025	58-9_25
Run26	Reunion	Petite Île		March, 2010	sorghum	Sorghum verticilliflorum	Ms22	CIR53#5809026	58-9_26	MSW094-13	KJ083122
Run26	Reunion	Petite Île		March, 2010	sorghum	Sorghum verticilliflorum	Ms16	CIR53#5809027	58-9_27
Run26	Reunion	Petite Île		March, 2010	sorghum	Sorghum verticilliflorum	Ms16	CIR53#5809028	58-9_28
Run26	Reunion	Petite Île		March, 2010	sorghum	Sorghum verticilliflorum	Ms16	CIR53#5809029	58-9_29
Run26	Reunion	Petite Île		March, 2010	sorghum	Sorghum verticilliflorum	Ms16	CIR53#5809031	58-9_31
Run26	Reunion	Petite Île		March, 2010	sorghum	Sorghum verticilliflorum	Ms16	CIR53#5809032	58-9_32
Run27	Reunion	Etang Salé	eRcane Experimental Station	March, 2010	sorghum	Sorghum verticilliflorum	Ms20	CIR53#6003001	60-3_1
Run27	Reunion	Etang Salé	eRcane Experimental Station	March, 2010	sorghum	Sorghum verticilliflorum	Ms20	CIR53#6003002	60-3_2
Run27	Reunion	Etang Salé	eRcane Experimental Station	March, 2010	sorghum	Sorghum verticilliflorum	Ms20	CIR53#6003003	60-3_3
Run27	Reunion	Etang Salé	eRcane Experimental Station	March, 2010	sorghum	Sorghum verticilliflorum	Ms20	CIR53#6003004	60-3_4
Run27	Reunion	Etang Salé	eRcane Experimental Station	March, 2010	sorghum	Sorghum verticilliflorum	Ms20	CIR53#6003005	60-3_5
Run27	Reunion	Etang Salé	eRcane Experimental Station	March, 2010	sorghum	Sorghum verticilliflorum	Ms20	CIR53#6003006	60-3_6
Run27	Reunion	Etang Salé	eRcane Experimental Station	March, 2010	sorghum	Sorghum verticilliflorum	Ms20	CIR53#6003007	60-3_7	MSW095-13	KJ083121
Run27	Reunion	Etang Salé	eRcane Experimental Station	March, 2010	sorghum	Sorghum verticilliflorum	Ms20	CIR53#6003008	60-3_8
Run27	Reunion	Etang Salé	eRcane Experimental Station	March, 2010	sorghum	Sorghum verticilliflorum	Ms20	CIR53#6003009	60-3_9
Run27	Reunion	Etang Salé	eRcane Experimental Station	March, 2010	sorghum	Sorghum verticilliflorum	Ms16	CIR53#6003010	60-3_10
Run27	Reunion	Etang Salé	eRcane Experimental Station	March, 2010	sorghum	Sorghum verticilliflorum	Ms20	CIR53#6003011	60-3_11
Run27	Reunion	Etang Salé	eRcane Experimental Station	March, 2010	sorghum	Sorghum verticilliflorum	Ms20	CIR53#6003012	60-3_12
Run27	Reunion	Etang Salé	eRcane Experimental Station	March, 2010	sorghum	Sorghum verticilliflorum	Ms16	CIR53#6003013	60-3_13
Run27	Reunion	Etang Salé	eRcane Experimental Station	March, 2010	sorghum	Sorghum verticilliflorum	Ms20	CIR53#6003014	60-3_14
Run27	Reunion	Etang Salé	eRcane Experimental Station	March, 2010	sorghum	Sorghum verticilliflorum	Ms16	CIR53#6003015	60-3_15
Run27	Reunion	Etang Salé	eRcane Experimental Station	March, 2010	sorghum	Sorghum verticilliflorum	Ms20	CIR53#6003016	60-3_16
Run27	Reunion	Etang Salé	eRcane Experimental Station	March, 2010	sorghum	Sorghum verticilliflorum	Ms16	CIR53#6003017	60-3_17
Run27	Reunion	Etang Salé	eRcane Experimental Station	March, 2010	sorghum	Sorghum verticilliflorum	Ms20	CIR53#6003018	60-3_18
Run27	Reunion	Etang Salé	eRcane Experimental Station	March, 2010	sorghum	Sorghum verticilliflorum	Ms16	CIR53#6003019	60-3_19
Run27	Reunion	Etang Salé	eRcane Experimental Station	March, 2010	sorghum	Sorghum verticilliflorum	Ms20	CIR53#6003020	60-3_20
Run27	Reunion	Etang Salé	eRcane Experimental Station	March, 2010	sorghum	Sorghum verticilliflorum	Ms20	CIR53#6003021	60-3_21
Run27	Reunion	Etang Salé	eRcane Experimental Station	March, 2010	sorghum	Sorghum verticilliflorum	Ms20	CIR53#6003022	60-3_22
Run27	Reunion	Etang Salé	eRcane Experimental Station	March, 2010	sorghum	Sorghum verticilliflorum	Ms20	CIR53#6003023	60-3_23
Run27	Reunion	Etang Salé	eRcane Experimental Station	March, 2010	sorghum	Sorghum verticilliflorum	Ms16	CIR53#6003024	60-3_24
Run27	Reunion	Etang Salé	eRcane Experimental Station	March, 2010	sorghum	Sorghum verticilliflorum	Ms16	CIR53#6003025	60-3_25
Run27	Reunion	Etang Salé	eRcane Experimental Station	March, 2010	sorghum	Sorghum verticilliflorum	Ms20	CIR53#6003026	60-3_26
Run27	Reunion	Etang Salé	eRcane Experimental Station	March, 2010	sorghum	Sorghum verticilliflorum	Ms20	CIR53#6003027	60-3_27
Run27	Reunion	Etang Salé	eRcane Experimental Station	March, 2010	sorghum	Sorghum verticilliflorum	Ms20	CIR53#6003028	60-3_28
Run27	Reunion	Etang Salé	eRcane Experimental Station	March, 2010	sorghum	Sorghum verticilliflorum	Ms16	CIR53#6003029	60-3_29
Run27	Reunion	Etang Salé	eRcane Experimental Station	March, 2010	sorghum	Sorghum verticilliflorum	Ms20	CIR53#6003030	60-3_30
Run27	Reunion	Etang Salé	eRcane Experimental Station	March, 2010	sorghum	Sorghum verticilliflorum	Ms20	CIR53#6003031	60-3_31
Run27	Reunion	Etang Salé	eRcane Experimental Station	March, 2010	sorghum	Sorghum verticilliflorum	Ms16	CIR53#6003032	60-3_32
Run28	Reunion	Cilaos	Mare sèche	April, 2010	sorghum	Sorghum verticilliflorum	Ms15	CIR53#6005001	60-5_1
Run28	Reunion	Cilaos	Mare sèche	April, 2010	sorghum	Sorghum verticilliflorum	Ms15	CIR53#6005003	60-5_3
Run28	Reunion	Cilaos	Mare sèche	April, 2010	sorghum	Sorghum verticilliflorum	Ms15	CIR53#6005005	60-5_5
Run28	Reunion	Cilaos	Mare sèche	April, 2010	sorghum	Sorghum verticilliflorum	Ms15	CIR53#6005006	60-5_6
Run28	Reunion	Cilaos	Mare sèche	April, 2010	sorghum	Sorghum verticilliflorum	Ms15	CIR53#6005008	60-5_8
Run28	Reunion	Cilaos	Mare sèche	April, 2010	sorghum	Sorghum verticilliflorum	Ms15	CIR53#6005009	60-5_9
Run28	Reunion	Cilaos	Mare sèche	April, 2010	sorghum	Sorghum verticilliflorum	Ms15	CIR53#6005010	60-5_10
Run28	Reunion	Cilaos	Mare sèche	April, 2010	sorghum	Sorghum verticilliflorum	Ms15	CIR53#6005011	60-5_11
Run28	Reunion	Cilaos	Mare sèche	April, 2010	sorghum	Sorghum verticilliflorum	Ms15	CIR53#6005012	60-5_12
Run28	Reunion	Cilaos	Mare sèche	April, 2010	sorghum	Sorghum verticilliflorum	Ms15	CIR53#6005013	60-5_13
Run28	Reunion	Cilaos	Mare sèche	April, 2010	sorghum	Sorghum verticilliflorum	Ms15	CIR53#6005014	60-5_14
Run28	Reunion	Cilaos	Mare sèche	April, 2010	sorghum	Sorghum verticilliflorum	Ms15	CIR53#6005016	60-5_16
Run28	Reunion	Cilaos	Mare sèche	April, 2010	sorghum	Sorghum verticilliflorum	Ms15	CIR53#6005017	60-5_17
Run28	Reunion	Cilaos	Mare sèche	April, 2010	sorghum	Sorghum verticilliflorum	Ms15	CIR53#6005018	60-5_18
Run28	Reunion	Cilaos	Mare sèche	April, 2010	sorghum	Sorghum verticilliflorum	Ms15	CIR53#6005019	60-5_19
Run28	Reunion	Cilaos	Mare sèche	April, 2010	sorghum	Sorghum verticilliflorum	Ms15	CIR53#6005020	60-5_20
Run28	Reunion	Cilaos	Mare sèche	April, 2010	sorghum	Sorghum verticilliflorum	Ms15	CIR53#6005022	60-5_22
Run28	Reunion	Cilaos	Mare sèche	April, 2010	sorghum	Sorghum verticilliflorum	Ms15	CIR53#6005024	60-5_24
Run28	Reunion	Cilaos	Mare sèche	April, 2010	sorghum	Sorghum verticilliflorum	Ms15	CIR53#6005025	60-5_25
Run28	Reunion	Cilaos	Mare sèche	April, 2010	sorghum	Sorghum verticilliflorum	Ms15	CIR53#6005026	60-5_26
Run28	Reunion	Cilaos	Mare sèche	April, 2010	sorghum	Sorghum verticilliflorum	Ms15	CIR53#6005027	60-5_27
Run28	Reunion	Cilaos	Mare sèche	April, 2010	sorghum	Sorghum verticilliflorum	Ms15	CIR53#6005028	60-5_28
Run28	Reunion	Cilaos	Mare sèche	April, 2010	sorghum	Sorghum verticilliflorum	Ms15	CIR53#6005031	60-5_31
Run28	Reunion	Cilaos	Mare sèche	April, 2010	sorghum	Sorghum verticilliflorum	Ms15	CIR53#6005032	60-5_32
Run29	Reunion	Saint Philippe	ravine pelote	April, 2010	sorghum	Sorghum verticilliflorum	Ms11	CIR53#6006001	60-6_1
Run29	Reunion	Saint Philippe	ravine pelote	April, 2010	sorghum	Sorghum verticilliflorum	Ms15	CIR53#6006002	60-6_2
Run29	Reunion	Saint Philippe	ravine pelote	April, 2010	sorghum	Sorghum verticilliflorum	Ms15	CIR53#6006003	60-6_3
Run29	Reunion	Saint Philippe	ravine pelote	April, 2010	sorghum	Sorghum verticilliflorum	Ms11	CIR53#6006004	60-6_4
Run29	Reunion	Saint Philippe	ravine pelote	April, 2010	sorghum	Sorghum verticilliflorum	Ms11	CIR53#6006005	60-6_5
Run29	Reunion	Saint Philippe	ravine pelote	April, 2010	sorghum	Sorghum verticilliflorum	Ms11	CIR53#6006006	60-6_6
Run29	Reunion	Saint Philippe	ravine pelote	April, 2010	sorghum	Sorghum verticilliflorum	Ms15	CIR53#6006007	60-6_7
Run29	Reunion	Saint Philippe	ravine pelote	April, 2010	sorghum	Sorghum verticilliflorum	Ms11	CIR53#6006008	60-6_8	MSW096-13	KJ083120
Run29	Reunion	Saint Philippe	ravine pelote	April, 2010	sorghum	Sorghum verticilliflorum	Ms11	CIR53#6006009	60-6_9
Run29	Reunion	Saint Philippe	ravine pelote	April, 2010	sorghum	Sorghum verticilliflorum	Ms16	CIR53#6006010	60-6_10
Run29	Reunion	Saint Philippe	ravine pelote	April, 2010	sorghum	Sorghum verticilliflorum	Ms16	CIR53#6006011	60-6_11
Run29	Reunion	Saint Philippe	ravine pelote	April, 2010	sorghum	Sorghum verticilliflorum	Ms15	CIR53#6006012	60-6_12
Run29	Reunion	Saint Philippe	ravine pelote	April, 2010	sorghum	Sorghum verticilliflorum	Ms11	CIR53#6006013	60-6_13
Run29	Reunion	Saint Philippe	ravine pelote	April, 2010	sorghum	Sorghum verticilliflorum	Ms16	CIR53#6006014	60-6_14
Run29	Reunion	Saint Philippe	ravine pelote	April, 2010	sorghum	Sorghum verticilliflorum	Ms11	CIR53#6006015	60-6_15
Run29	Reunion	Saint Philippe	ravine pelote	April, 2010	sorghum	Sorghum verticilliflorum	Ms11	CIR53#6006016	60-6_16
Run29	Reunion	Saint Philippe	ravine pelote	April, 2010	sorghum	Sorghum verticilliflorum	Ms11	CIR53#6006017	60-6_17
Run29	Reunion	Saint Philippe	ravine pelote	April, 2010	sorghum	Sorghum verticilliflorum	Ms12	CIR53#6006018	60-6_18
Run29	Reunion	Saint Philippe	ravine pelote	April, 2010	sorghum	Sorghum verticilliflorum	Ms11	CIR53#6006019	60-6_19
Run29	Reunion	Saint Philippe	ravine pelote	April, 2010	sorghum	Sorghum verticilliflorum	Ms11	CIR53#6006020	60-6_20
Run29	Reunion	Saint Philippe	ravine pelote	April, 2010	sorghum	Sorghum verticilliflorum	Ms11	CIR53#6006021	60-6_21
Run29	Reunion	Saint Philippe	ravine pelote	April, 2010	sorghum	Sorghum verticilliflorum	Ms11	CIR53#6006022	60-6_22
Run29	Reunion	Saint Philippe	ravine pelote	April, 2010	sorghum	Sorghum verticilliflorum	Ms11	CIR53#6006023	60-6_23
Run29	Reunion	Saint Philippe	ravine pelote	April, 2010	sorghum	Sorghum verticilliflorum	Ms11	CIR53#6006024	60-6_24
Run29	Reunion	Saint Philippe	ravine pelote	April, 2010	sorghum	Sorghum verticilliflorum	Ms11	CIR53#6006025	60-6_25
Run29	Reunion	Saint Philippe	ravine pelote	April, 2010	sorghum	Sorghum verticilliflorum	Ms15	CIR53#6006026	60-6_26
Run29	Reunion	Saint Philippe	ravine pelote	April, 2010	sorghum	Sorghum verticilliflorum	Ms15	CIR53#6006027	60-6_27
Run29	Reunion	Saint Philippe	ravine pelote	April, 2010	sorghum	Sorghum verticilliflorum	Ms15	CIR53#6006028	60-6_28
Run29	Reunion	Saint Philippe	ravine pelote	April, 2010	sorghum	Sorghum verticilliflorum	Ms11	CIR53#6006029	60-6_29
Run29	Reunion	Saint Philippe	ravine pelote	April, 2010	sorghum	Sorghum verticilliflorum	Ms11	CIR53#6006031	60-6_31	MSW097-13	KJ083119
Run29	Reunion	Saint Philippe	ravine pelote	April, 2010	sorghum	Sorghum verticilliflorum	Ms15	CIR53#6006032	60-6_32
Run30	Reunion	Cilaos	Cap rouge	April, 2010	sorghum	Sorghum verticilliflorum	Ms15	CIR53#6010001	60-10_1
Run30	Reunion	Cilaos	Cap rouge	April, 2010	sorghum	Sorghum verticilliflorum	Ms15	CIR53#6010002	60-10_2
Run30	Reunion	Cilaos	Cap rouge	April, 2010	sorghum	Sorghum verticilliflorum	Ms15	CIR53#6010003	60-10_3
Run30	Reunion	Cilaos	Cap rouge	April, 2010	sorghum	Sorghum verticilliflorum	Ms15	CIR53#6010004	60-10_4
Run30	Reunion	Cilaos	Cap rouge	April, 2010	sorghum	Sorghum verticilliflorum	Ms15	CIR53#6010005	60-10_5
Run30	Reunion	Cilaos	Cap rouge	April, 2010	sorghum	Sorghum verticilliflorum	Ms15	CIR53#6010007	60-10_7
Run30	Reunion	Cilaos	Cap rouge	April, 2010	sorghum	Sorghum verticilliflorum	Ms15	CIR53#6010008	60-10_8
Run30	Reunion	Cilaos	Cap rouge	April, 2010	sorghum	Sorghum verticilliflorum	Ms15	CIR53#6010009	60-10_9
Run30	Reunion	Cilaos	Cap rouge	April, 2010	sorghum	Sorghum verticilliflorum	Ms15	CIR53#6010010	60-10_10
Run30	Reunion	Cilaos	Cap rouge	April, 2010	sorghum	Sorghum verticilliflorum	Ms15	CIR53#6010012	60-10_12
Run30	Reunion	Cilaos	Cap rouge	April, 2010	sorghum	Sorghum verticilliflorum	Ms15	CIR53#6010013	60-10_13
Run30	Reunion	Cilaos	Cap rouge	April, 2010	sorghum	Sorghum verticilliflorum	Ms15	CIR53#6010014	60-10_14
Run30	Reunion	Cilaos	Cap rouge	April, 2010	sorghum	Sorghum verticilliflorum	Ms15	CIR53#6010015	60-10_15
Run30	Reunion	Cilaos	Cap rouge	April, 2010	sorghum	Sorghum verticilliflorum	Ms15	CIR53#6010016	60-10_16
Run30	Reunion	Cilaos	Cap rouge	April, 2010	sorghum	Sorghum verticilliflorum	Ms15	CIR53#6010017	60-10_17
Run30	Reunion	Cilaos	Cap rouge	April, 2010	sorghum	Sorghum verticilliflorum	Ms15	CIR53#6010018	60-10_18
Run30	Reunion	Cilaos	Cap rouge	April, 2010	sorghum	Sorghum verticilliflorum	Ms15	CIR53#6010020	60-10_20
Run30	Reunion	Cilaos	Cap rouge	April, 2010	sorghum	Sorghum verticilliflorum	Ms15	CIR53#6010021	60-10_21
Run30	Reunion	Cilaos	Cap rouge	April, 2010	sorghum	Sorghum verticilliflorum	Ms15	CIR53#6010022	60-10_22
Run30	Reunion	Cilaos	Cap rouge	April, 2010	sorghum	Sorghum verticilliflorum	Ms15	CIR53#6010024	60-10_24
Run30	Reunion	Cilaos	Cap rouge	April, 2010	sorghum	Sorghum verticilliflorum	Ms15	CIR53#6010025	60-10_25
Run30	Reunion	Cilaos	Cap rouge	April, 2010	sorghum	Sorghum verticilliflorum	Ms15	CIR53#6010026	60-10_26
Run30	Reunion	Cilaos	Cap rouge	April, 2010	sorghum	Sorghum verticilliflorum	Ms15	CIR53#6010027	60-10_27
Run30	Reunion	Cilaos	Cap rouge	April, 2010	sorghum	Sorghum verticilliflorum	Ms15	CIR53#6010028	60-10_28
Run30	Reunion	Cilaos	Cap rouge	April, 2010	sorghum	Sorghum verticilliflorum	Ms15	CIR53#6010030	60-10_30
Run30	Reunion	Cilaos	Cap rouge	April, 2010	sorghum	Sorghum verticilliflorum	Ms15	CIR53#6010031	60-10_31
Run30	Reunion	Cilaos	Cap rouge	April, 2010	sorghum	Sorghum verticilliflorum	Ms15	CIR53#6010032	60-10_32
Run31	Reunion	Sainte Anne		April, 2009	sugarcane	Saccharum sp.	Ms11	CIR53#2204001	22-4_1
Run31	Reunion	Sainte Anne		April, 2009	sugarcane	Saccharum sp.	Ms11	CIR53#2204002	22-4_2
Run31	Reunion	Sainte Anne		April, 2009	sugarcane	Saccharum sp.	Ms11	CIR53#2204003	22-4_3
Run31	Reunion	Sainte Anne		April, 2009	sugarcane	Saccharum sp.	Ms11	CIR53#2204004	22-4_4
Run31	Reunion	Sainte Anne		April, 2009	sugarcane	Saccharum sp.	Ms23	CIR53#2204006	22-4_6	MSW024-13	KJ083192
Run31	Reunion	Sainte Anne		April, 2009	sugarcane	Saccharum sp.	Ms16	CIR53#2204007	22-4_7
Run31	Reunion	Sainte Anne		April, 2009	sugarcane	Saccharum sp.	Ms11	CIR53#2204008	22-4_8
Run31	Reunion	Sainte Anne		April, 2009	sugarcane	Saccharum sp.	Ms23	CIR53#2204009	22-4_9
Run31	Reunion	Sainte Anne		April, 2009	sugarcane	Saccharum sp.	Ms16	CIR53#2204010	22-4_10
Run31	Reunion	Sainte Anne		April, 2009	sugarcane	Saccharum sp.	Ms16	CIR53#2204011	22-4_11
Run31	Reunion	Sainte Anne		April, 2009	sugarcane	Saccharum sp.	Ms11	CIR53#2204012	22-4_12
Run31	Reunion	Sainte Anne		April, 2009	sugarcane	Saccharum sp.	Ms11	CIR53#2204015	22-4_15
Run31	Reunion	Sainte Anne		April, 2009	sugarcane	Saccharum sp.	Ms11	CIR53#2204016	22-4_16
Run31	Reunion	Sainte Anne		April, 2009	sugarcane	Saccharum sp.	Ms11	CIR53#2204017	22-4_17
Run31	Reunion	Sainte Anne		April, 2009	sugarcane	Saccharum sp.	Ms11	CIR53#2204018	22-4_18
Run31	Reunion	Sainte Anne		April, 2009	sugarcane	Saccharum sp.	Ms11	CIR53#2204019	22-4_19
Run31	Reunion	Sainte Anne		April, 2009	sugarcane	Saccharum sp.	Ms16	CIR53#2204020	22-4_20
Run31	Reunion	Sainte Anne		April, 2009	sugarcane	Saccharum sp.	Ms11	CIR53#2204021	22-4_21
Run31	Reunion	Sainte Anne		April, 2009	sugarcane	Saccharum sp.	Ms11	CIR53#2204022	22-4_22
Run31	Reunion	Sainte Anne		April, 2009	sugarcane	Saccharum sp.	Ms11	CIR53#2204023	22-4_23
Run31	Reunion	Sainte Anne		April, 2009	sugarcane	Saccharum sp.	Ms11	CIR53#2204024	22-4_24
Run31	Reunion	Sainte Anne		April, 2009	sugarcane	Saccharum sp.	Ms23	CIR53#2204025	22-4_25
Run31	Reunion	Sainte Anne		April, 2009	sugarcane	Saccharum sp.	Ms11	CIR53#2204026	22-4_26
Run31	Reunion	Sainte Anne		April, 2009	sugarcane	Saccharum sp.	Ms11	CIR53#2204027	22-4_27
Run31	Reunion	Sainte Anne		April, 2009	sugarcane	Saccharum sp.	Ms11	CIR53#2204028	22-4_28
Run31	Reunion	Sainte Anne		April, 2009	sugarcane	Saccharum sp.	Ms11	CIR53#2204029	22-4_29
Run31	Reunion	Sainte Anne		April, 2009	sugarcane	Saccharum sp.	Ms16	CIR53#2204032	22-4_32

## Sheet: 64 ind. sample
Sample	State	Locality	Place	Date of sampling	Longitude	Latitude	Host plant (com. name)	Host plant (sci. name)	MLG	Specimen ID	Field ID
Run1	Reunion	Sainte Marie	eRcane Experimental Station	June, 2007	-20.905	55.532	sugarcane	Saccharum sp.	Ms16	CIR53#SMA1009	SMA1_9
Run2	Reunion	Etang Salé	eRcane Experimental Station	April, 2008	-21.267	55.379	sugarcane	Saccharum sp.	Ms16	CIR53#2223001	22.23_1
Run2	Reunion	Etang Salé	eRcane Experimental Station	April, 2008	-21.267	55.379	sugarcane	Saccharum sp.	Ms12	CIR53#2223010	22.23_10
Run3	Reunion	Saint-Pierre	Ligne Paradis Cirad Station	October, 2007	-21.32	55.485	sugarcane	Saccharum sp.	Ms16	CIR53#3001001	30-1_1
Run4	Reunion	Savanna	ISB	April, 2008	-20.982	55.297	sugarcane	Saccharum sp.	Ms21	CIR53#2220001	22-20_1
Run4	Reunion	Savanna	ISB	April, 2008	-20.982	55.297	sugarcane	Saccharum sp.	Ms16	CIR53#2220012	22-20_12
Run5	Reunion	Saint André	Sugar factory	April, 2008	-20.982	55.663	sugarcane	Saccharum sp.	Ms16	CIR53#2211001	22-11_1
Run6	Reunion	Entre Deux		March, 2009	-21.236	55.471	wild sudan grass	Sorghum verticilliflorum	Ms15	CIR53#6302001	30_1
Run7	Reunion	Bras Panon	Beauvallon	January, 2010	-21.009	55.688	wild sudan grass	Sorghum verticilliflorum	Ms16	CIR53#2222001	22-22_1
Run8	Reunion	Salazie	Mare à citrons	March, 2010	-21.033	55.523	wild sudan grass	Sorghum verticilliflorum	Ms15	CIR53#2212002	22-12_2
Run9	Reunion	Sainte Marie	eRcane Experimental Station	October, 2007	-20.9053	55.5322	sugarcane	Saccharum sp.	Ms16	CIR53#2202001	22-2_1
Run9	Reunion	Sainte Marie	eRcane Experimental Station	October, 2007	-20.9053	55.5322	sugarcane	Saccharum sp.	Ms11	CIR53#2202022	22-2_22
Run10	Reunion	Sainte Marie	eRcane Experimental Station	October, 2007	-20.9053	55.5322	sugarcane	Saccharum sp.	Ms16	CIR53#2221001	22-21_1
Run10	Reunion	Sainte Marie	eRcane Experimental Station	October, 2007	-20.9053	55.5322	sugarcane	Saccharum sp.	Ms21	CIR53#2221019	22-21_19
Run10	Reunion	Sainte Marie	eRcane Experimental Station	October, 2007	-20.9053	55.5322	sugarcane	Saccharum sp.	Ms19	CIR53#2221032	22-21_32
Run11	Reunion	Saint Leu	Maduran	April, 2008	-21.2	55.3167	sugarcane	Saccharum sp.	Ms12	CIR53#2201001	22-1_1
Run11	Reunion	Saint Leu	Maduran	April, 2008	-21.2	55.3167	sugarcane	Saccharum sp.	Ms16	CIR53#2201002	22-1_2
Run12	Reunion	Petite Île		April, 2008	-21.3706	55.5797	sugarcane	Saccharum sp.	Ms11	CIR53#2205001	22-5_1
Run12	Reunion	Petite Île		April, 2008	-21.3706	55.5797	sugarcane	Saccharum sp.	Ms12	CIR53#2205002	22-5_2
Run12	Reunion	Petite Île		April, 2008	-21.3706	55.5797	sugarcane	Saccharum sp.	Ms16	CIR53#2205005	22-5_5
Run13	Reunion	Saint Philippe	eRcane Experimental Station	April, 2008	-21.3583	55.6975	sugarcane	Saccharum sp.	Ms11	CIR53#2218001	22-18_1
Run13	Reunion	Saint Philippe	eRcane Experimental Station	April, 2008	-21.3583	55.6975	sugarcane	Saccharum sp.	Ms22	CIR53#2218014	22-18_14
Run13	Reunion	Saint Philippe	eRcane Experimental Station	April, 2008	-21.3583	55.6975	sugarcane	Saccharum sp.	Ms23	CIR53#2218017	22-18_17
Run14	Reunion	Piton Sainte Rose		April, 2008	-21.1539	55.8217	sugarcane	Saccharum sp.	Ms16	CIR53#2228001	22-28_1
Run14	Reunion	Piton Sainte Rose		April, 2008	-21.1539	55.8217	sugarcane	Saccharum sp.	Ms11	CIR53#2228005	22-28_5
Run15	Reunion	Entre Deux	Bras Long school	June, 2008	-21.236	55.471	wild sudan grass	Sorghum verticilliflorum	Ms17	CIR53#6301902	EDE1_2
Run15	Reunion	Entre Deux	Bras Long school	June, 2008	-21.236	55.471	wild sudan grass	Sorghum verticilliflorum	Ms18	CIR53#6301923	EDE1_23
Run16	Reunion	La Saline les Hauts	Vue Belle	January, 2010	-21.0825	55.2931	sugarcane	Saccharum sp.	Ms14	CIR53#7801001	78-1_1
Run16	Reunion	La Saline les Hauts	Vue Belle	January, 2010	-21.0825	55.2931	sugarcane	Saccharum sp.	Ms16	CIR53#7801003	78-1_3
Run16	Reunion	La Saline les Hauts	Vue Belle	January, 2010	-21.0825	55.2931	sugarcane	Saccharum sp.	Ms11	CIR53#7801004	78-1_4
Run17	Reunion	Salazie	Mare à Citrons - Le verger	March, 2010	-21.0328	55.5228	sugarcane	Saccharum sp.	Ms11	CIR53#2203001	22-3_1
Run17	Reunion	Salazie	Mare à Citrons - Le verger	March, 2010	-21.0328	55.5228	sugarcane	Saccharum sp.	Ms16	CIR53#2203007	22-3_7
Run18	Reunion	Grande Chaloupe	Route Corniche	January, 2010	-20.8992	55.3756	wild sudan grass	Sorghum verticilliflorum	Ms15	CIR53#2206001	22-6_1
Run19	Reunion	Saint Pierre	Bassin Martin experimental station	February, 2010	-21.3078	55.5078	sugarcane	Saccharum sp.	Ms16	CIR53#2213001	22-13_1
Run19	Reunion	Saint Pierre	Bassin Martin experimental station	February, 2010	-21.3078	55.5078	sugarcane	Saccharum sp.	Ms11	CIR53#2213004	22-13_4
Run19	Reunion	Saint Pierre	Bassin Martin experimental station	February, 2010	-21.3078	55.5078	sugarcane	Saccharum sp.	Ms15	CIR53#2213012	22-13_12
Run20	Reunion	Savanna	ISB	January, 2010	-20.985	55.2989	wild sudan grass	Sorghum verticilliflorum	Ms13	CIR53#2214001	22-14_1
Run20	Reunion	Savanna	ISB	January, 2010	-20.985	55.2989	wild sudan grass	Sorghum verticilliflorum	Ms15	CIR53#2214006	22-14_6
Run21	Reunion	Saint André	parc colosse	January, 2010	-20.9269	55.6625	wild sudan grass	Sorghum verticilliflorum	Ms15	CIR53#2229001	22-29_1
Run21	Reunion	Saint André	parc colosse	January, 2010	-20.9269	55.6625	wild sudan grass	Sorghum verticilliflorum	Ms16	CIR53#2229015	22-29_15
Run22	Reunion	Piton Sainte Rose		February, 2010	-21.1364	55.8064	wild sudan grass	Sorghum verticilliflorum	Ms15	CIR53#5801001	58-1_1
Run23	Reunion	Saint Gilles les Hauts	Antenne 4	February, 2010	-21.0661	55.2506	wild sudan grass	Sorghum verticilliflorum	Ms15	CIR53#5803002	58-3_2
Run23	Reunion	Saint Gilles les Hauts	Antenne 4	February, 2010	-21.0661	55.2506	wild sudan grass	Sorghum verticilliflorum	Ms12	CIR53#5803003	58-3_3
Run23	Reunion	Saint Gilles les Hauts	Antenne 4	February, 2010	-21.0661	55.2506	wild sudan grass	Sorghum verticilliflorum	Ms16	CIR53#5803004	58-3_4
Run24	Reunion	Sainte Anne	national road	February, 2010	-21.0964	55.7481	wild sudan grass	Sorghum verticilliflorum	Ms16	CIR53#5804001	58-4_1
Run24	Reunion	Sainte Anne	national road	February, 2010	-21.0964	55.7481	wild sudan grass	Sorghum verticilliflorum	Ms15	CIR53#5804006	58-4_6
Run24	Reunion	Sainte Anne	national road	February, 2010	-21.0964	55.7481	wild sudan grass	Sorghum verticilliflorum	Ms14	CIR53#5804028	58-4_28
Run25	Reunion	Saint Pierre	Bassin Martin experimental station	February, 2010	-21.3078	55.5078	wild sudan grass	Sorghum verticilliflorum	Ms15	CIR53#5807001	58-7_1
Run25	Reunion	Saint Pierre	Bassin Martin experimental station	February, 2010	-21.3078	55.5078	wild sudan grass	Sorghum verticilliflorum	Ms16	CIR53#5807003	58-7_3
Run26	Reunion	Petite Île		March, 2010	-21.3689	55.5761	wild sudan grass	Sorghum verticilliflorum	Ms15	CIR53#5809001	58-9_1
Run26	Reunion	Petite Île		March, 2010	-21.3689	55.5761	wild sudan grass	Sorghum verticilliflorum	Ms16	CIR53#5809002	58-9_2
Run26	Reunion	Petite Île		March, 2010	-21.3689	55.5761	wild sudan grass	Sorghum verticilliflorum	Ms11	CIR53#5809016	58-9_16
Run26	Reunion	Petite Île		March, 2010	-21.3689	55.5761	wild sudan grass	Sorghum verticilliflorum	Ms22	CIR53#5809026	58-9_26
Run27	Reunion	Etang Salé	eRcane Experimental Station	March, 2010	-21.2664	55.3817	wild sudan grass	Sorghum verticilliflorum	Ms20	CIR53#6003001	60-3_1
Run27	Reunion	Etang Salé	eRcane Experimental Station	March, 2010	-21.2664	55.3817	wild sudan grass	Sorghum verticilliflorum	Ms16	CIR53#6003010	60-3_10
Run28	Reunion	Cilaos	Mare sèche	April, 2010	-21.1436	55.465	wild sudan grass	Sorghum verticilliflorum	Ms15	CIR53#6005001	60-5_1
Run29	Reunion	Saint Philippe	ravine pelote	April, 2010	-21.3583	55.7642	wild sudan grass	Sorghum verticilliflorum	Ms11	CIR53#6006001	60-6_1
Run29	Reunion	Saint Philippe	ravine pelote	April, 2010	-21.3583	55.7642	wild sudan grass	Sorghum verticilliflorum	Ms15	CIR53#6006002	60-6_2
Run29	Reunion	Saint Philippe	ravine pelote	April, 2010	-21.3583	55.7642	wild sudan grass	Sorghum verticilliflorum	Ms16	CIR53#6006010	60-6_10
Run29	Reunion	Saint Philippe	ravine pelote	April, 2010	-21.3583	55.7642	wild sudan grass	Sorghum verticilliflorum	Ms12	CIR53#6006018	60-6_18
Run30	Reunion	Cilaos	Cap rouge	April, 2010	-21.1881	55.4514	wild sudan grass	Sorghum verticilliflorum	Ms15	CIR53#6010001	60-10_1
Run31	Reunion	Sainte Anne		April, 2009	-21.0865	55.7458	sugarcane	Saccharum sp.	Ms11	CIR53#2204001	22-4_1
Run31	Reunion	Sainte Anne		April, 2009	-21.0865	55.7458	sugarcane	Saccharum sp.	Ms23	CIR53#2204006	22-4_6
Run31	Reunion	Sainte Anne		April, 2009	-21.0865	55.7458	sugarcane	Saccharum sp.	Ms16	CIR53#2204007	22-4_7
